# Supplementary material
Source: MDPI journal article supplement (https://www.mdpi.com/1424-8247/14/8/815)
Supplement: s1 [file s1]

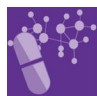

## Supporting Information

# Synthesis and Cytotoxic Activity of Combretastatin A-4 and 2,3-Diphenyl-2*H*-indazole Hybrids

Jaime Pérez-Villanueva <sup>1,\*</sup>, Félix Matadamas-Martínez <sup>1,2</sup>, Lilián Yépez-Mulia <sup>3,\*</sup>, Vadim Pérez-Koldenkova <sup>4</sup>, Martha Leyte-Lugo <sup>5</sup>, Karen Rodríguez-Villar <sup>6</sup>, Francisco Cortés-Benítez <sup>1</sup>, Ana Perla Macías-Jiménez <sup>1</sup>, Juan Francisco Palacios-Espinosa <sup>1</sup>, Ignacio González-Sánchez <sup>5</sup>, Ariana Romero-Velásquez <sup>7</sup>, Olivia Soria-Arteche <sup>1</sup>

<sup>1</sup> Departamento de Sistemas Biológicos, División de Ciencias Biológicas y de la Salud, Universidad Autónoma Metropolitana-Xochimilco (UAM-X), Ciudad de México 04960, Mexico; felixmatadamas@yahoo.com.mx (F.M.-M.); jcortesb@correo.xoc.uam.mx (F.C.-B.); anmacp61@gmail.com (A.P.M.-J.); jpalcios@correo.xoc.uam.mx (J.F.P.-E.); soriao@correo.xoc.uam.mx (O.S.-A.).

<sup>2</sup> Maestría y Doctorado en Ciencias Farmacéuticas, División de Ciencias Biológicas y de la Salud, Universidad Autónoma Metropolitana-Xochimilco (UAM-X), Ciudad de México 04960, Mexico; felixmatadamas@yahoo.com.mx (F.M.-M.).

<sup>3</sup> Unidad de Investigación Médica en Enfermedades Infecciosas y Parasitarias, UMAE Hospital de Pediatría, Centro Médico Siglo XXI, Instituto Mexicano del Seguro Social, Ciudad de México 06720, Mexico; lilianyepez@yahoo.com (L.Y.-M.).

<sup>4</sup> Laboratorio Nacional de Microscopía Avanzada, Centro Médico Nacional Siglo XXI, Instituto Mexicano del Seguro Social, Ciudad de México 06720, Mexico; vadim.perez@imss.gob.mx (V.P.-K.).

<sup>5</sup> Catedrático CONACYT comisionado a Departamento de Sistemas Biológicos, División de Ciencias Biológicas y de la Salud, Universidad Autónoma Metropolitana-Xochimilco (UAM-X), Ciudad de México 04960, Mexico; mailto:mleyte@correo.xoc.uam.mx (M.L.-L.); ignacio.gonzalez.s@gmail.com (I.G.-Z.).

<sup>6</sup> Doctorado en Ciencias Biológicas y de la Salud, Universidad Autónoma Metropolitana (UAM), Ciudad de México 04960, Mexico; qkarenrodv@hotmail.com (K.R.-V.)

<sup>7</sup> Maestría en Ciencias Biológicas, Universidad Nacional Autónoma de México (UNAM), Ciudad de México 04510, Mexico; ariromerov@gmail.com (A.R.-V.)

\* Correspondence: jpvillanueva@correo.xoc.uam.mx (J.P.-V.); Tel.: +52-5-54-83-72-59; Fax: +52-5-55-94-79-29; lilianyepez@yahoo.com (L.Y.-M.).

## Table of Contents:

| Contents                                                                                                                                            | Page |
|-----------------------------------------------------------------------------------------------------------------------------------------------------|------|
| <b>Table S1.</b> Palladium-catalyzed arylation of 3-bromophenylindazoles and microwave assisted modification                                        | S4   |
| <b>Table S2.</b> Cellular viability $\pm$ SE on HeLa cell line upon treatment with compounds <b>1–9</b> at 50 $\mu$ M                               | S5   |
| <b>Table S3.</b> Antioxidant activity ( $IC_{50}$ $\mu$ M) of compounds <b>4–6</b> employing DPPH and ABTS assays.                                  | S6   |
| <b>Table S4.</b> Purity of compounds <b>4</b> , <b>5</b> , and <b>6</b> by qNMR used an internal standard (%purity, mean $\pm$ standard deviation). | S7   |
| <b>Figure S1.</b> $^1H$ NMR (600 MHz, $CDCl_3$ ) for 2-phenyl-2 <i>H</i> -indazole ( <b>1</b> ).                                                    | S8   |
| <b>Figure S2.</b> $^{13}C$ NMR (151 MHz, $CDCl_3$ ) for 2-phenyl-2 <i>H</i> -indazole ( <b>1</b> ).                                                 | S9   |
| <b>Figure S3.</b> $^1H$ NMR (600 MHz, $CDCl_3$ ) for 2-(3,4,5-trimethoxyphenyl)-2 <i>H</i> -indazole ( <b>2</b> ).                                  | S10  |
| <b>Figure S4.</b> $^{13}C$ NMR (151 MHz, $CDCl_3$ ) for 2-(3,4,5-trimethoxyphenyl)-2 <i>H</i> -indazole ( <b>2</b> ).                               | S11  |
| <b>Figure S5.</b> $^1H$ NMR (600 MHz, $CDCl_3$ ) for 5-(2 <i>H</i> -indazol-2-yl)-2-methoxyphenol ( <b>3</b> ).                                     | S12  |
| <b>Figure S6.</b> $^{13}C$ NMR (151 MHz, $CDCl_3$ ) for 5-(2 <i>H</i> -indazol-2-yl)-2-methoxyphenol ( <b>3</b> ).                                  | S13  |
| <b>Figure S7.</b> MS (HR-ESI) for 5-(2 <i>H</i> -indazol-2-yl)-2-methoxyphenol ( <b>3</b> ).                                                        | S14  |
| <b>Figure S8.</b> $^1H$ NMR (600 MHz, $CDCl_3$ ) for 3-bromo-2-phenyl-2 <i>H</i> -indazole ( <b>1b</b> ).                                           | S15  |
| <b>Figure S9.</b> $^{13}C$ NMR (151 MHz, $CDCl_3$ ) for 3-bromo-2-phenyl-2 <i>H</i> -indazole ( <b>1b</b> ).                                        | S16  |
| <b>Figure S10.</b> $^1H$ NMR (600 MHz, $CDCl_3$ ) for 3-bromo-2-(3,4,5-trimethoxyphenyl)-2 <i>H</i> -indazole ( <b>2b</b> ).                        | S17  |
| <b>Figure S11.</b> $^{13}C$ NMR (151 MHz, $CDCl_3$ ) for 3-bromo-2-(3,4,5-trimethoxyphenyl)-2 <i>H</i> -indazole ( <b>2b</b> ).                     | S18  |
| <b>Figure S12.</b> $^1H$ NMR (600 MHz, $CDCl_3$ ) for 5-(3-bromo-2 <i>H</i> -indazol-2-yl)-2-methoxyphenol ( <b>3b</b> ).                           | S19  |
| <b>Figure S13.</b> $^{13}C$ NMR (151 MHz, $CDCl_3$ ) for 5-(3-bromo-2 <i>H</i> -indazol-2-yl)-2-methoxyphenol ( <b>3b</b> ).                        | S20  |
| <b>Figure S14.</b> $^1H$ NMR (600 MHz, $CDCl_3$ ) for 2,3-diphenyl-2 <i>H</i> -indazole ( <b>4</b> ).                                               | S21  |
| <b>Figure S15.</b> $^{13}C$ NMR (151 MHz, $CDCl_3$ ) for 2,3-diphenyl-2 <i>H</i> -indazole ( <b>4</b> ).                                            | S22  |
| <b>Figure S16.</b> $^1H$ NMR (600 MHz, $CDCl_3$ ) for 2-methoxy-5-(2-(3,4,5-trimethoxyphenyl)-2 <i>H</i> -indazol-3-yl)phenol ( <b>5</b> ).         | S23  |
| <b>Figure S17.</b> $^{13}C$ NMR (151 MHz, $CDCl_3$ ) for 2-methoxy-5-(2-(3,4,5-trimethoxyphenyl)-2 <i>H</i> -indazol-3-yl)phenol ( <b>5</b> ).      | S24  |
| <b>Figure S18.</b> MS (HR-ESI) for 2-methoxy-5-(2-(3,4,5-trimethoxyphenyl)-2 <i>H</i> -indazol-3-yl)phenol ( <b>5</b> ).                            | S25  |
| <b>Figure S19.</b> $^1H$ NMR (600 MHz, $CDCl_3$ ) for 2-methoxy-5-(3-(3,4,5-trimethoxyphenyl)-2 <i>H</i> -indazol-2-yl)phenol ( <b>6</b> ).         | S26  |
| <b>Figure S20.</b> $^{13}C$ NMR (151 MHz, $CDCl_3$ ) for 2-methoxy-5-(3-(3,4,5-trimethoxyphenyl)-2 <i>H</i> -indazol-2-yl)phenol ( <b>6</b> ).      | S27  |
| <b>Figure S21.</b> MS (EI) for 2-methoxy-5-(3-(3,4,5-trimethoxyphenyl)-2 <i>H</i> -indazol-2-yl)phenol ( <b>6</b> ).                                | S28  |

---

|                                                                                                                                                                                                                                                                                                                                                                       |     |
|-----------------------------------------------------------------------------------------------------------------------------------------------------------------------------------------------------------------------------------------------------------------------------------------------------------------------------------------------------------------------|-----|
| <b>Figure S22.</b> <sup>1</sup> H NMR (600 MHz, CDCl <sub>3</sub> ) for 3-phenyl-1 <i>H</i> -indazole ( <b>7</b> ).                                                                                                                                                                                                                                                   | S29 |
| <b>Figure S23.</b> <sup>13</sup> C NMR (151 MHz, CDCl <sub>3</sub> ) for 3-phenyl-1 <i>H</i> -indazole ( <b>7</b> ).                                                                                                                                                                                                                                                  | S30 |
| <b>Figure S24.</b> <sup>1</sup> H NMR (600 MHz, CDCl <sub>3</sub> ) for 3-(3,4,5-trimethoxyphenyl)-1 <i>H</i> -indazole ( <b>8</b> ).                                                                                                                                                                                                                                 | S31 |
| <b>Figure S25.</b> <sup>13</sup> C NMR (151 MHz, CDCl <sub>3</sub> ) for 3-(3,4,5-trimethoxyphenyl)-1 <i>H</i> -indazole ( <b>8</b> ).                                                                                                                                                                                                                                | S32 |
| <b>Figure S26.</b> MS (EI) for 3-(3,4,5-trimethoxyphenyl)-1 <i>H</i> -indazole ( <b>8</b> ).                                                                                                                                                                                                                                                                          | S33 |
| <b>Figure S27.</b> <sup>1</sup> H NMR (600 MHz, DMSO- <i>d</i> <sub>6</sub> ) for 5-(1 <i>H</i> -indazol-3-yl)-2-methoxyphenol ( <b>9</b> ).                                                                                                                                                                                                                          | S34 |
| <b>Figure S28.</b> <sup>13</sup> C NMR (151 MHz, DMSO- <i>d</i> <sub>6</sub> ) for 5-(1 <i>H</i> -indazol-3-yl)-2-methoxyphenol ( <b>9</b> ).                                                                                                                                                                                                                         | S35 |
| <b>Figure S29.</b> MS (EI) for 5-(1 <i>H</i> -indazol-3-yl)-2-methoxyphenol ( <b>9</b> ).                                                                                                                                                                                                                                                                             | S36 |
| <b>Figure S30.</b> Morphological changes of HeLa cells after 48 h of treatment. A) vehicle (DMSO); B) Compound <b>5</b> (10 μM); C) Compound <b>6</b> (10 μM).                                                                                                                                                                                                        | S37 |
| <b>Figure S31.</b> Quantitative apoptosis assay of HeLa using Annexin V-FITC/Ghost-Red. Biparametric representation obtained from the flow cytometry assay of control HeLa cells (Control) or treated with compound <b>5</b> (0.16 μM) at 48 h. Q4 (viable cells), the apoptosis ratios (early plus late apoptotic cells, Q3 + Q2 quadrants) and Q1 (necrotic cells). |     |

---

**Table S1.** Palladium-catalyzed arylation of 3-bromophenylindazoles and microwave assisted modification.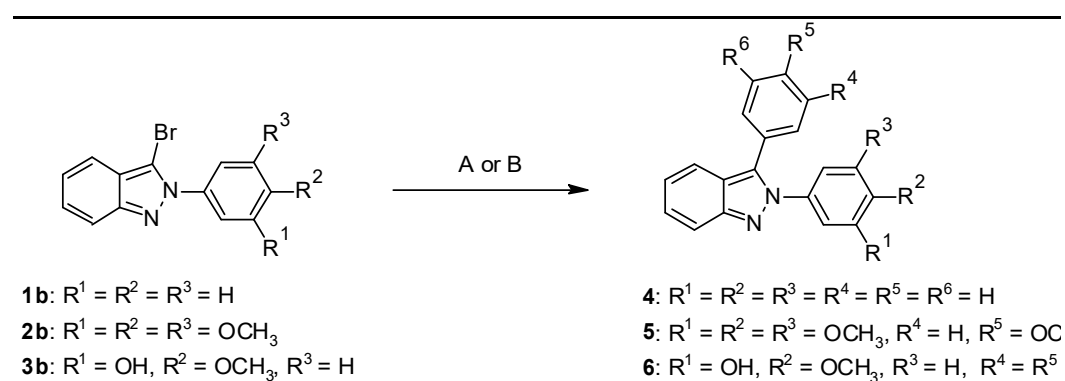

| Compound | % Yield (Method A) <sup>a</sup> | % Yield (Method B) <sup>b</sup> |
|----------|---------------------------------|---------------------------------|
| <b>4</b> | 78                              | 84                              |
| <b>5</b> | 44                              | 68                              |
| <b>6</b> | 44                              | 72                              |

<sup>a</sup> Method A: Appropriate phenylboronic acid or phenylboronic acid pinacol ester (0.63 mmol, 1.05 eq), 1-propanol (3 mL), Pd(OAc)<sub>2</sub> (0.3%), (C<sub>6</sub>H<sub>5</sub>)<sub>3</sub>P (0.9%), Na<sub>2</sub>CO<sub>3</sub> (0.72 mmol, 1.2 eq), H<sub>2</sub>O (0.6 mL), reflux 1–3 h.

<sup>b</sup> Method B: Appropriate phenylboronic acid or phenylboronic acid pinacol ester (0.63 mmol, 1.05 eq), 1-propanol (3 mL), Pd(OAc)<sub>2</sub> (1%), (C<sub>6</sub>H<sub>5</sub>)<sub>3</sub>P (3%), Na<sub>2</sub>CO<sub>3</sub> (0.72 mmol, 1.2 eq), H<sub>2</sub>O (0.6 mL), Microwaves, 150 °C, 20 min.

**Table S2.** Cellular viability  $\pm$  SE on HeLa cell line upon treatment with compounds 1–9 at 50  $\mu$ M.

| 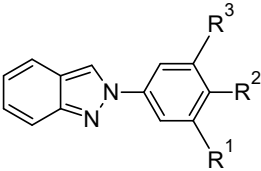 |                  |                  |  |                  |                  |                  |  |
|-----------------------------------------------------------------------------------|------------------|------------------|------------------------------------------------------------------------------------|------------------|------------------|------------------|-------------------------------------------------------------------------------------|
| <b>1–3</b>                                                                        |                  |                  | <b>4–6</b>                                                                         |                  |                  |                  | <b>7–9</b>                                                                          |
| Compound                                                                          | R <sup>1</sup>   | R <sup>2</sup>   | R <sup>3</sup>                                                                     | R <sup>4</sup>   | R <sup>5</sup>   | R <sup>6</sup>   | HeLa                                                                                |
| <b>1</b>                                                                          | H                | H                | H                                                                                  | -                | -                | -                | 130.91 $\pm$ 10.17                                                                  |
| <b>2</b>                                                                          | OCH <sub>3</sub> | OCH <sub>3</sub> | OCH <sub>3</sub>                                                                   | -                | -                | -                | 79.38 $\pm$ 11.35                                                                   |
| <b>3</b>                                                                          | OH               | OCH <sub>3</sub> | H                                                                                  | -                | -                | -                | 89.36 $\pm$ 19.38                                                                   |
| <b>4</b>                                                                          | H                | H                | H                                                                                  | H                | H                | H                | 89.88 $\pm$ 2.38                                                                    |
| <b>5</b>                                                                          | OCH <sub>3</sub> | OCH <sub>3</sub> | OCH <sub>3</sub>                                                                   | H                | OCH <sub>3</sub> | OH               | 37.12 $\pm$ 4.56                                                                    |
| <b>6</b>                                                                          | OH               | OCH <sub>3</sub> | H                                                                                  | OCH <sub>3</sub> | OCH <sub>3</sub> | OCH <sub>3</sub> | 41.41 $\pm$ 1.09                                                                    |
| <b>7</b>                                                                          | H                | H                | H                                                                                  | -                | -                | -                | 111.25 $\pm$ 2.25                                                                   |
| <b>8</b>                                                                          | OCH <sub>3</sub> | OCH <sub>3</sub> | OCH <sub>3</sub>                                                                   | -                | -                | -                | 73.95 $\pm$ 2.14                                                                    |
| <b>9</b>                                                                          | OH               | OCH <sub>3</sub> | H                                                                                  | -                | -                | -                | 70.11 $\pm$ 4.70                                                                    |

**Table S3.** Antioxidant activity (IC<sub>50</sub> [μM]) of compounds **4–6** employing DPPH and ABTS assays.

| Compound | DPPH     | ABTS     |
|----------|----------|----------|
| 4        | Inactive | Inactive |
| 5        | Inactive | 215.7    |
| 6        | Inactive | 262.09   |
| Trolox   | 21.57    | 71.91    |

**Table S4.** Purity of compounds **4**, **5**, and **6** by qNMR used an internal standard (% purity, mean  $\pm$  standard deviation).

| Compound   | Signal   | (S-CH <sub>2</sub> -)<br>% | (-CH <sub>2</sub> -)<br>% | (-CH <sub>2</sub> -Si)<br>% | % purity $\pm$<br>SD <sup>a</sup> |
|------------|----------|----------------------------|---------------------------|-----------------------------|-----------------------------------|
| <b>4</b>   | H7 + H4  | 101.03                     | 97.38                     | 99.32                       | 98.01 $\pm$ 2.10                  |
|            | H5       | 98.52                      | 94.96                     | 96.86                       |                                   |
| <b>5</b>   | H7       | 99.42                      | 96.21                     | 99.31                       | 98.46 $\pm$ 1.75                  |
|            | H4       | 98.79                      | 95.59                     | 98.68                       |                                   |
|            | H6       | 100.51                     | 97.26                     | 100.4                       |                                   |
| <b>6</b>   | H7       | 97.00                      | 95.05                     | 96.17                       | 96.65 $\pm$ 1.43                  |
|            | H4       | 96.63                      | 94.69                     | 95.81                       |                                   |
|            | H6       | 99.11                      | 97.11                     | 98.26                       |                                   |
| <b>Std</b> | ArH (4H) | 98.65                      | 99.04                     | 98.94                       | 98.88 $\pm$ 0.20                  |

<sup>a</sup> The purity of compounds was determined by qNMR using 2,2-dimethyl-2-silapentane-5-sulfonate sodium salt (DSS, 97%, Sigma-Aldrich) as an internal standard. The 4-bromobenzonitrile (99%, Sigma-Aldrich) was used for the validation of the method (**Std**). As solvent deuterated dimethyl sulfoxide-d<sub>6</sub> (DMSO-*d*<sub>6</sub>, > 99.96%, CIL) was used. Samples were prepared as a mixture of compounds tested and DSS was dissolved in DMSO-*d*<sub>6</sub>. The measurements were carried out with an Agilent DD2 spectrometer operating at 600 MHz. In general, the experiments were acquired employing the parameters: 90 ° pulse, an acquisition time of 7 s, relaxation delay of 60 s, digital resolution of 0.8 Hz, a spectral window of 15 ppm, and a total of 64 scans. Phase and baseline corrections were done automatically using the software MestReNova v.6.0.2. The signal integration was done in automatic mode. For determination of purity were used separated signals of indazole ring in the aromatic region and three signals of DSS (CH<sub>2</sub>) in the aliphatic region. The percentage of purity was calculated by Equation:

$$P_{Sample} = \frac{I_{Sample}}{I_{Std}} \times \frac{N_{Std}}{N_{Sample}} \times \frac{M_{Sample}}{M_{Std}} \times \frac{m_{Std}}{m_{Sample}} \times P_{Std}$$

where *I* is the integrated area, *N* is the number of spins, *M* is the molar mass, *m* is the gravimetric weight, and *P* is the purity in % w/w.

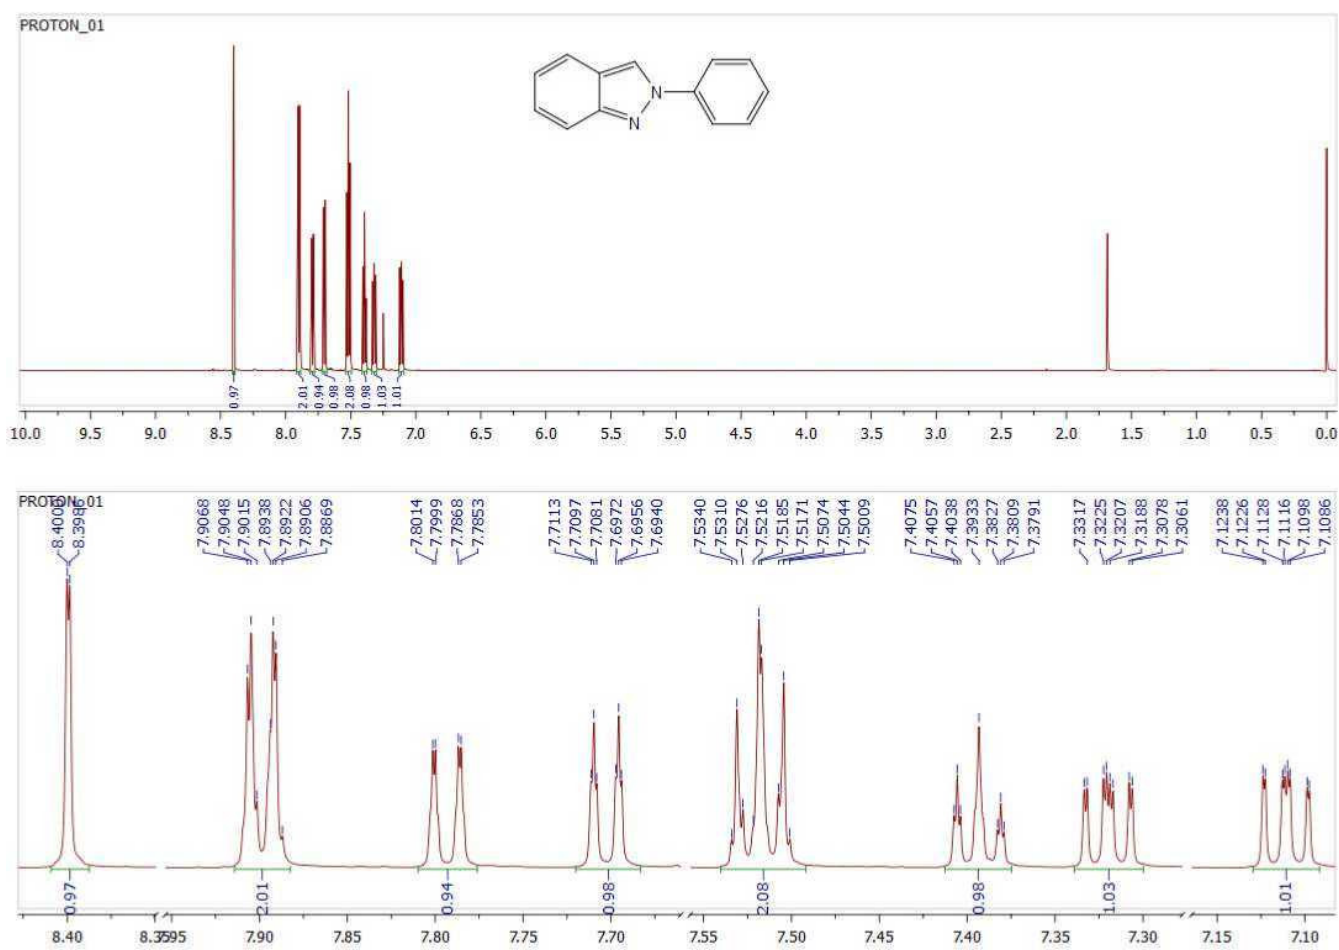

Figure S1.  $^1\text{H}$  NMR (600 MHz,  $\text{CDCl}_3$ ) for 2-phenyl-2H-indazole (1).



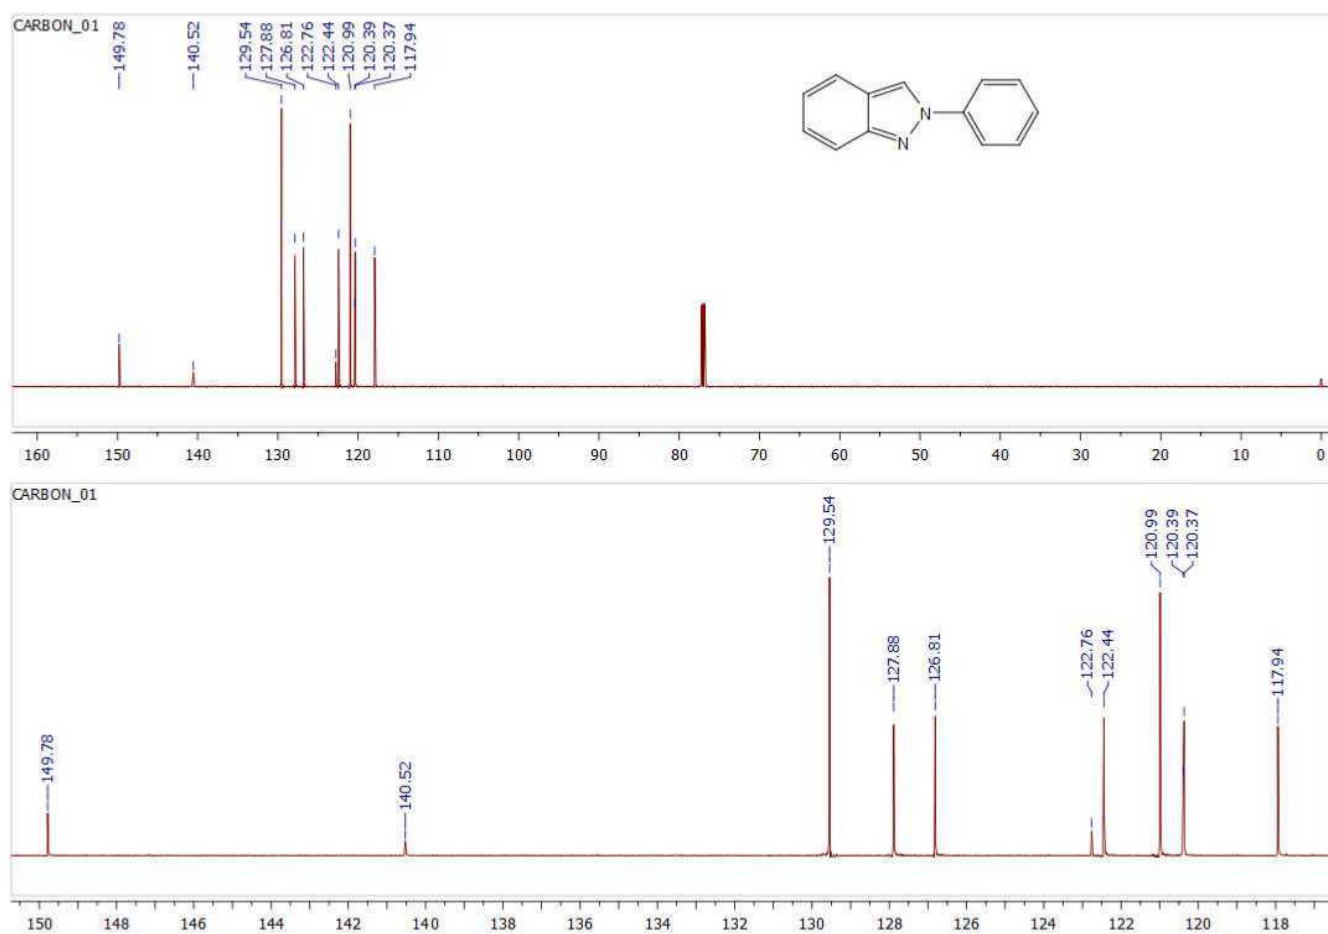

**Figure S2.**  $^{13}\text{C}$  NMR (151 MHz,  $\text{CDCl}_3$ ) for 2-phenyl-2H-indazole (1).

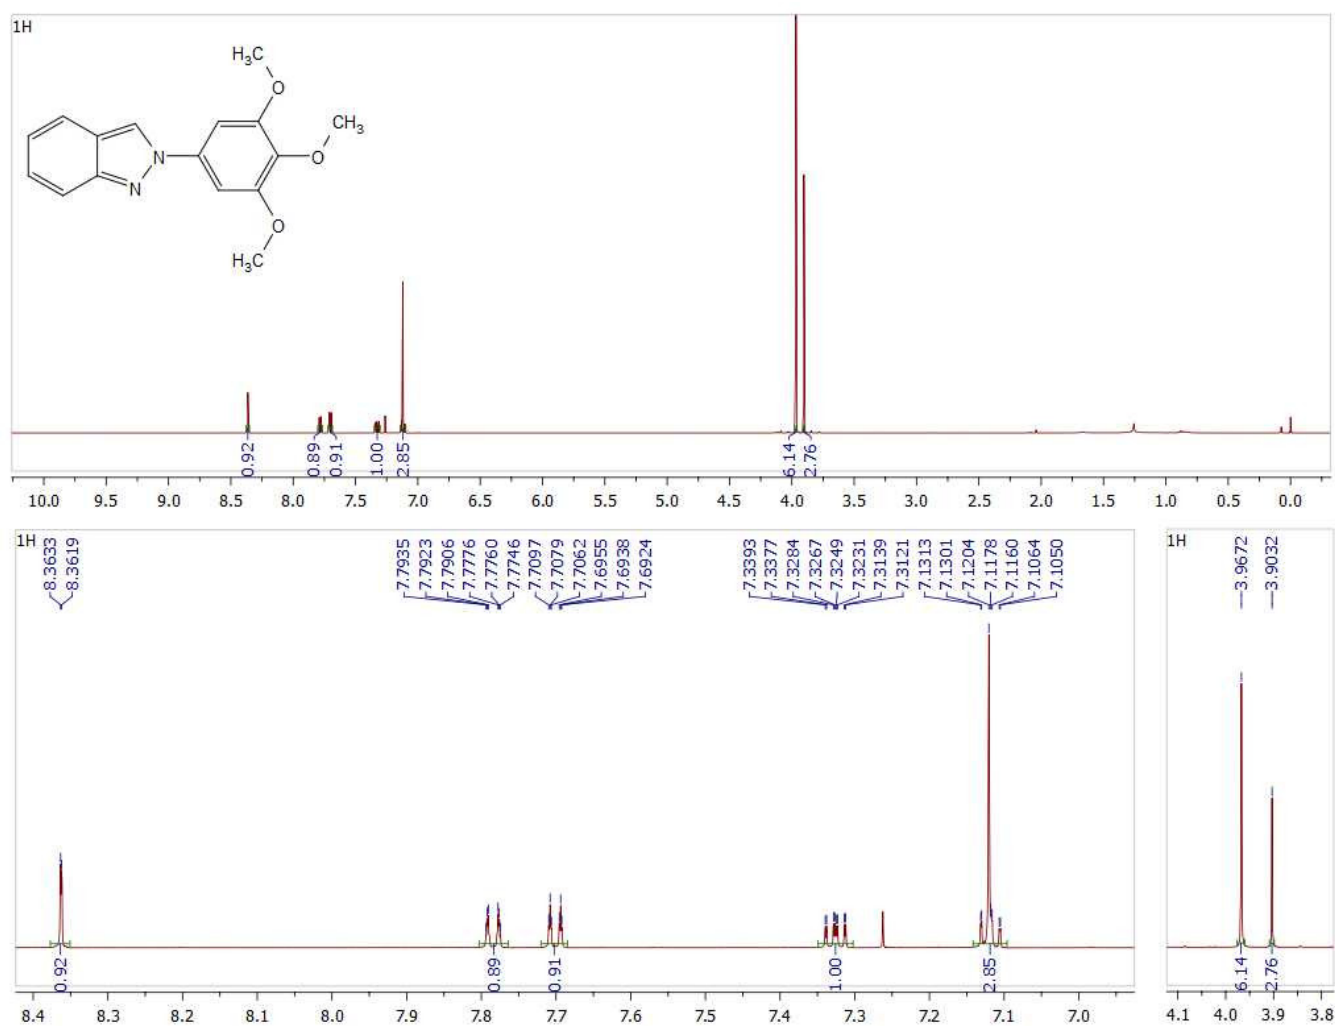

**Figure S3.** <sup>1</sup>H NMR (600 MHz, CDCl<sub>3</sub>) for 2-(3,4,5-trimethoxyphenyl)-2H-indazole (2).

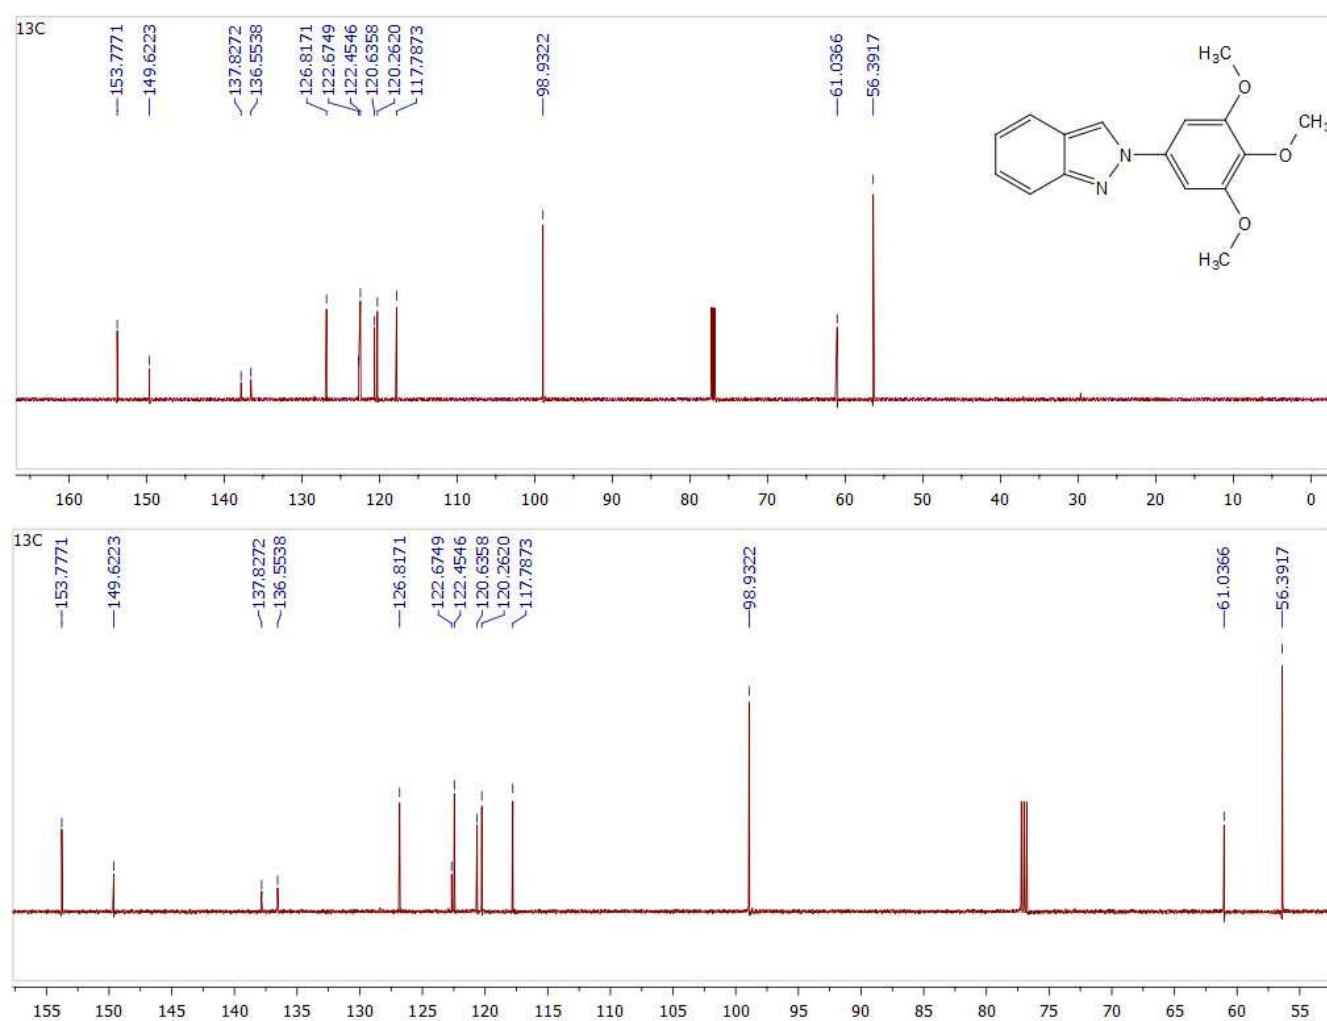

**Figure S4.**  $^{13}\text{C}$  NMR (151 MHz,  $\text{CDCl}_3$ ) for 2-(3,4,5-trimethoxyphenyl)-2H-indazole (2).

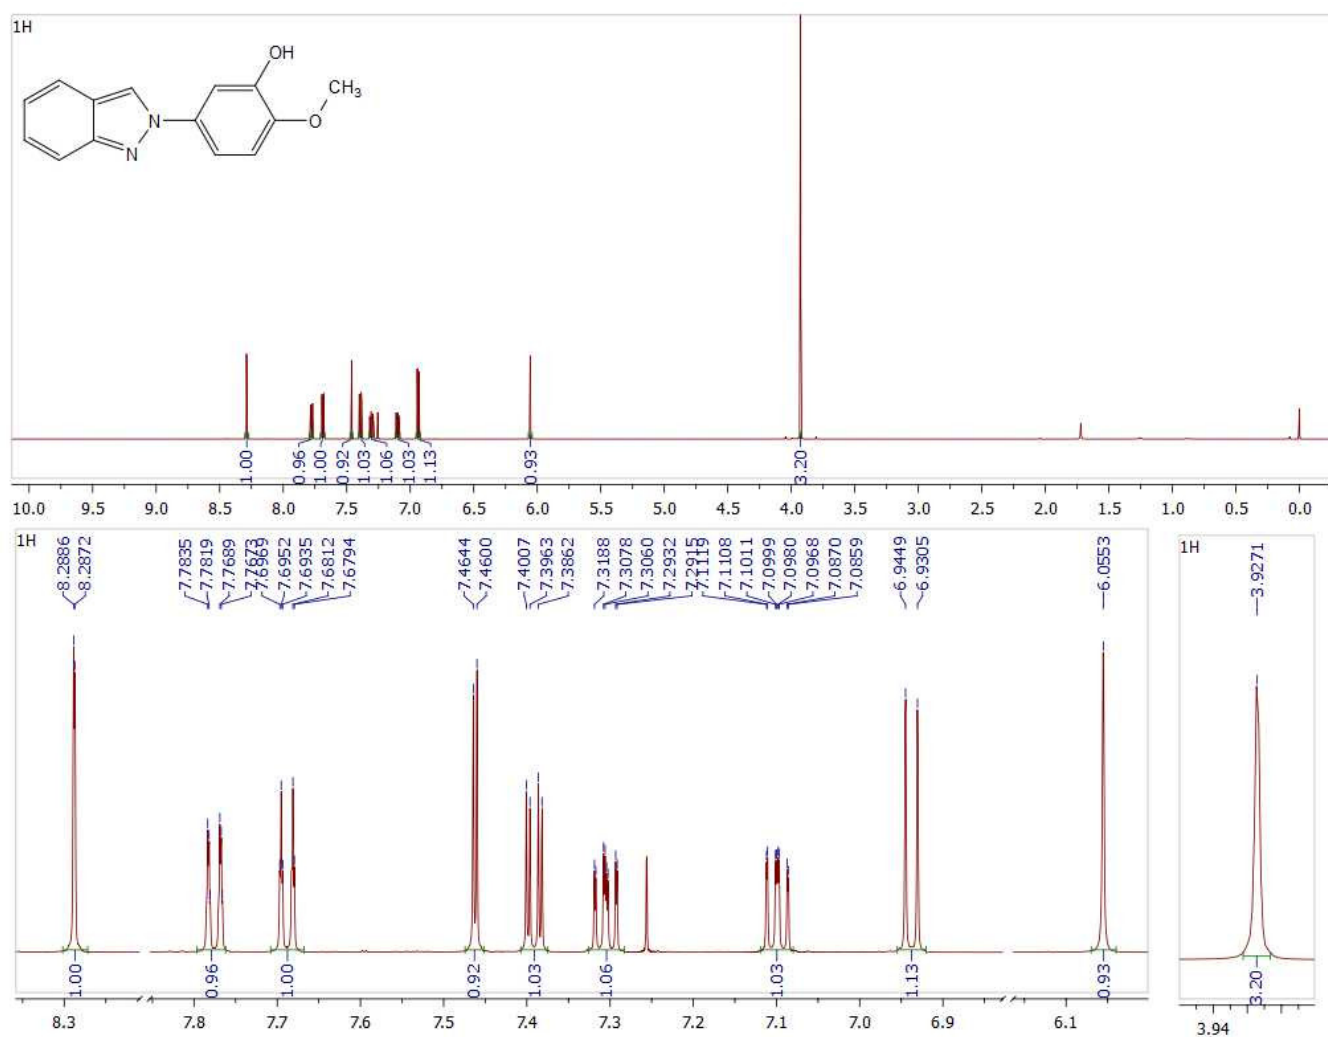

Figure S5. <sup>1</sup>H NMR (600 MHz, CDCl<sub>3</sub>) for 5-(2H-indazol-2-yl)-2-methoxyphenol (3).

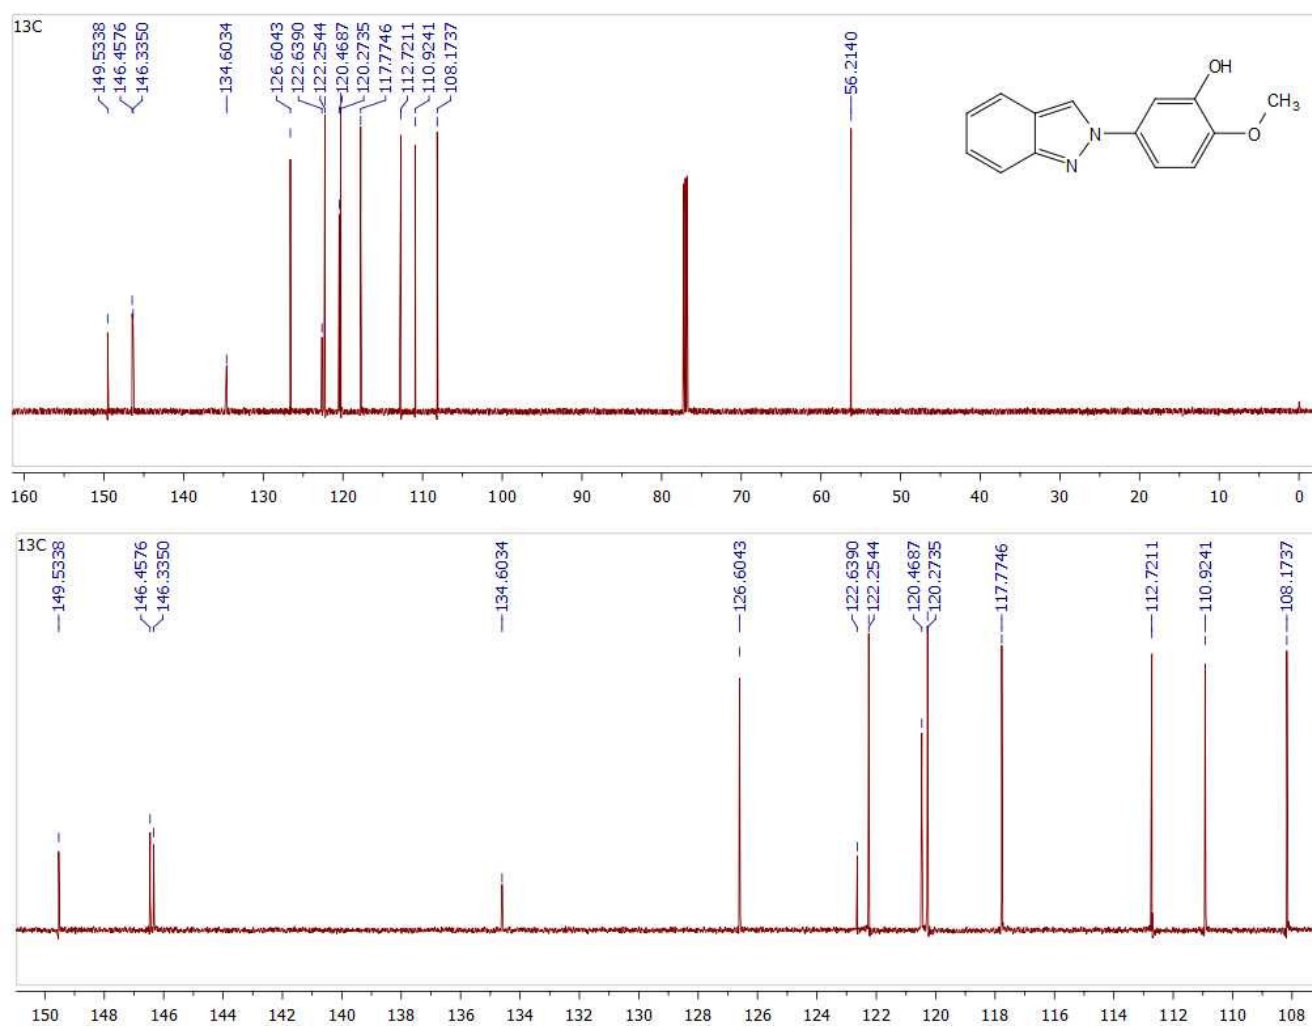

Figure S6.  $^{13}\text{C}$  NMR (151 MHz,  $\text{CDCl}_3$ ) for 5-(2H-indazol-2-yl)-2-methoxyphenol (3).

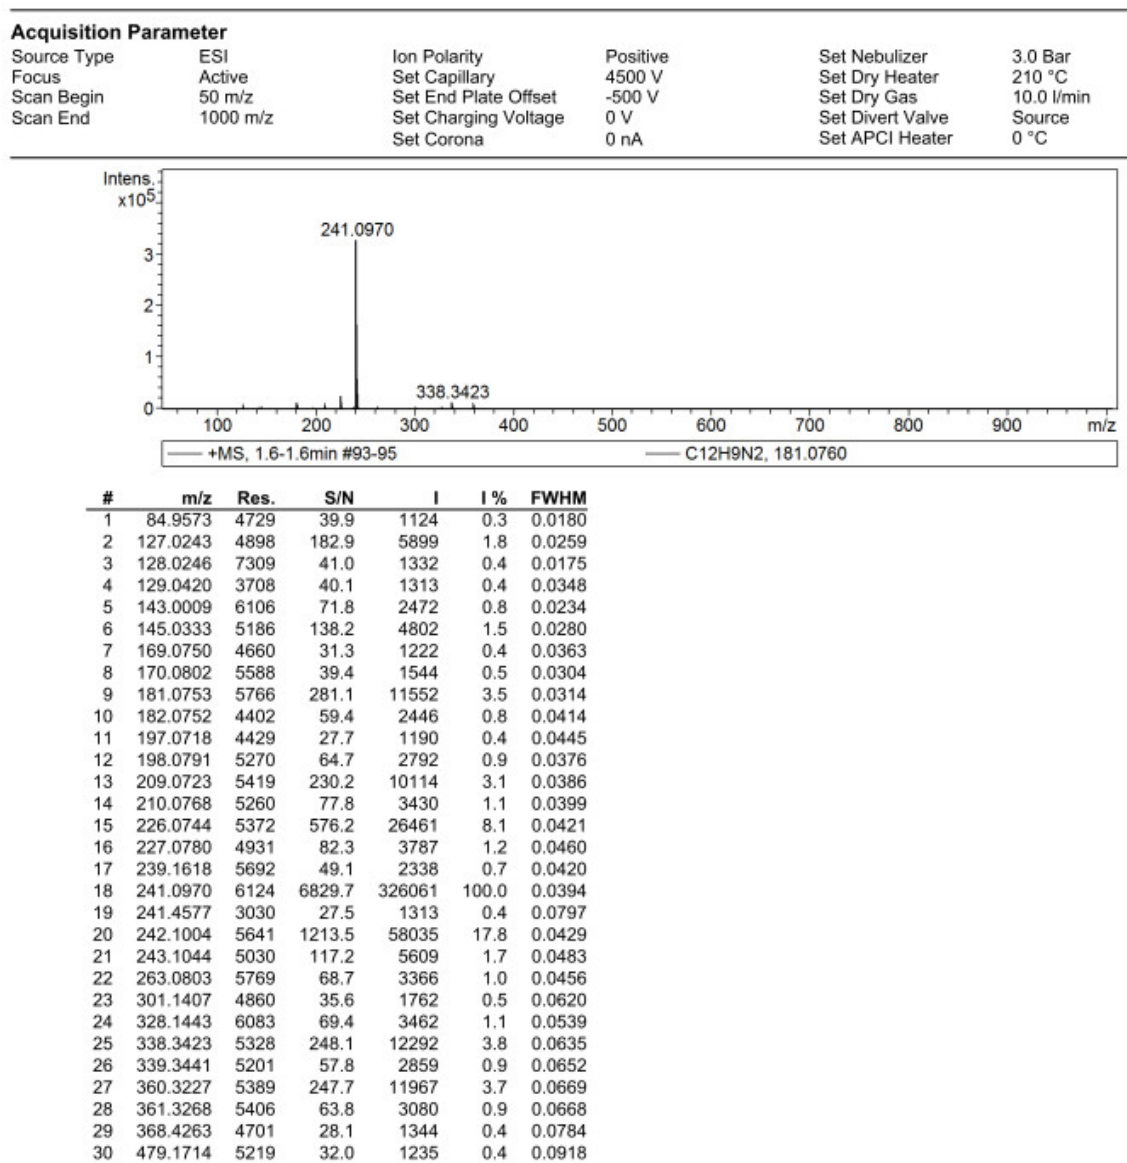

**Figure S7.** MS (HR-ESI) for 5-(2*H*-indazol-2-yl)-2-methoxyphenol (**3**).

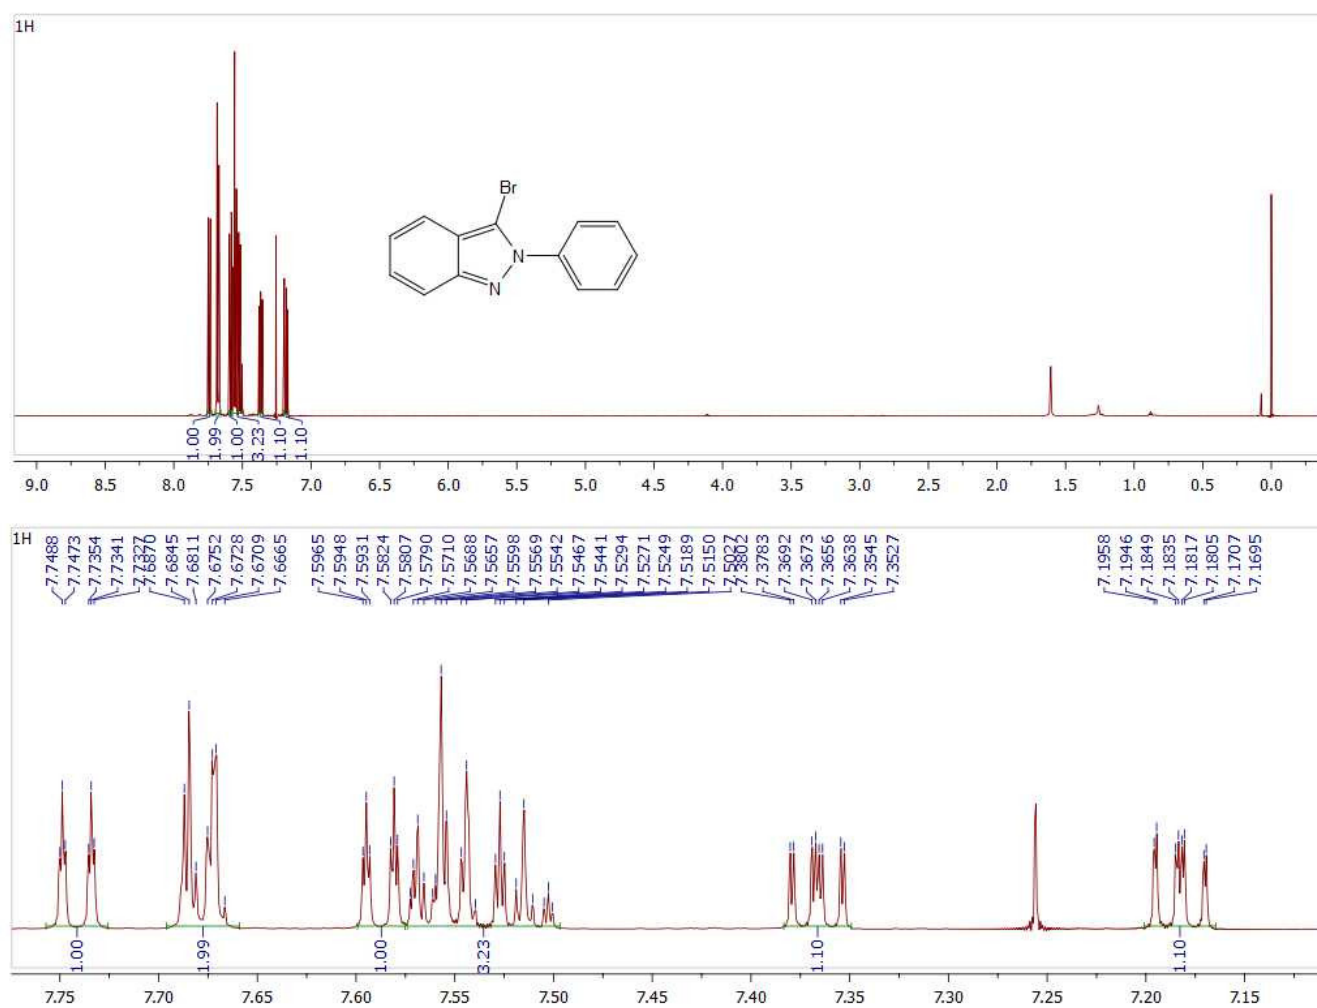

**Figure S8.**  $^1\text{H}$  NMR (600 MHz,  $\text{CDCl}_3$ ) for 3-bromo-2-phenyl-2H-indazole (**1b**).

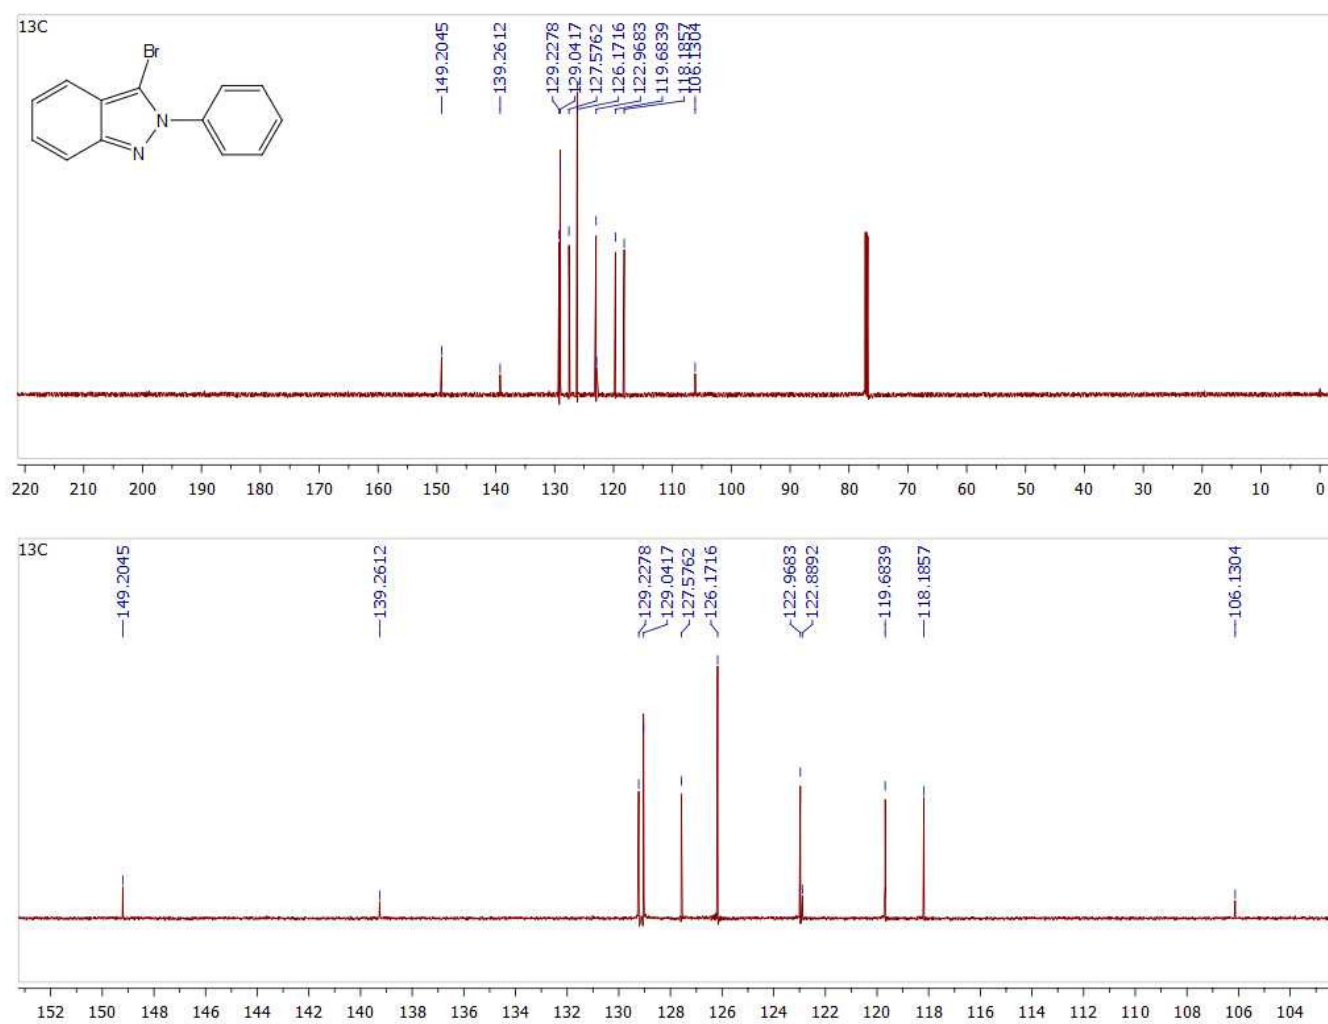

**Figure S9.**  $^{13}\text{C}$  NMR (151 MHz,  $\text{CDCl}_3$ ) for 3-bromo-2-phenyl-2H-indazole (**1b**).



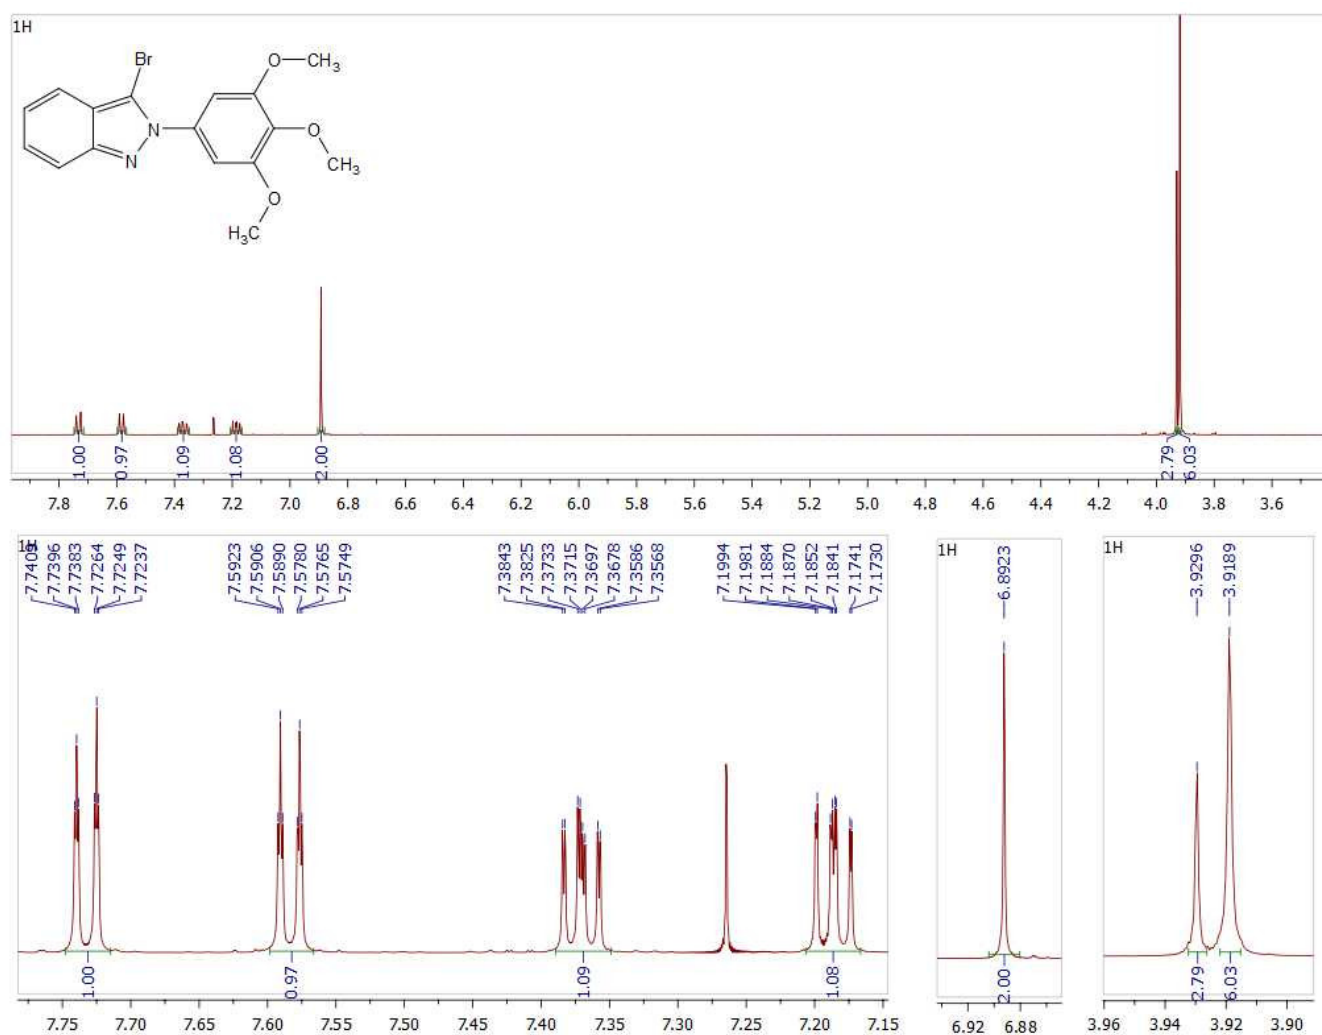

**Figure S10.**  $^1\text{H}$  NMR (600 MHz,  $\text{CDCl}_3$ ) for 3-bromo-2-(3,4,5-trimethoxyphenyl)-2H-indazole (**2b**).

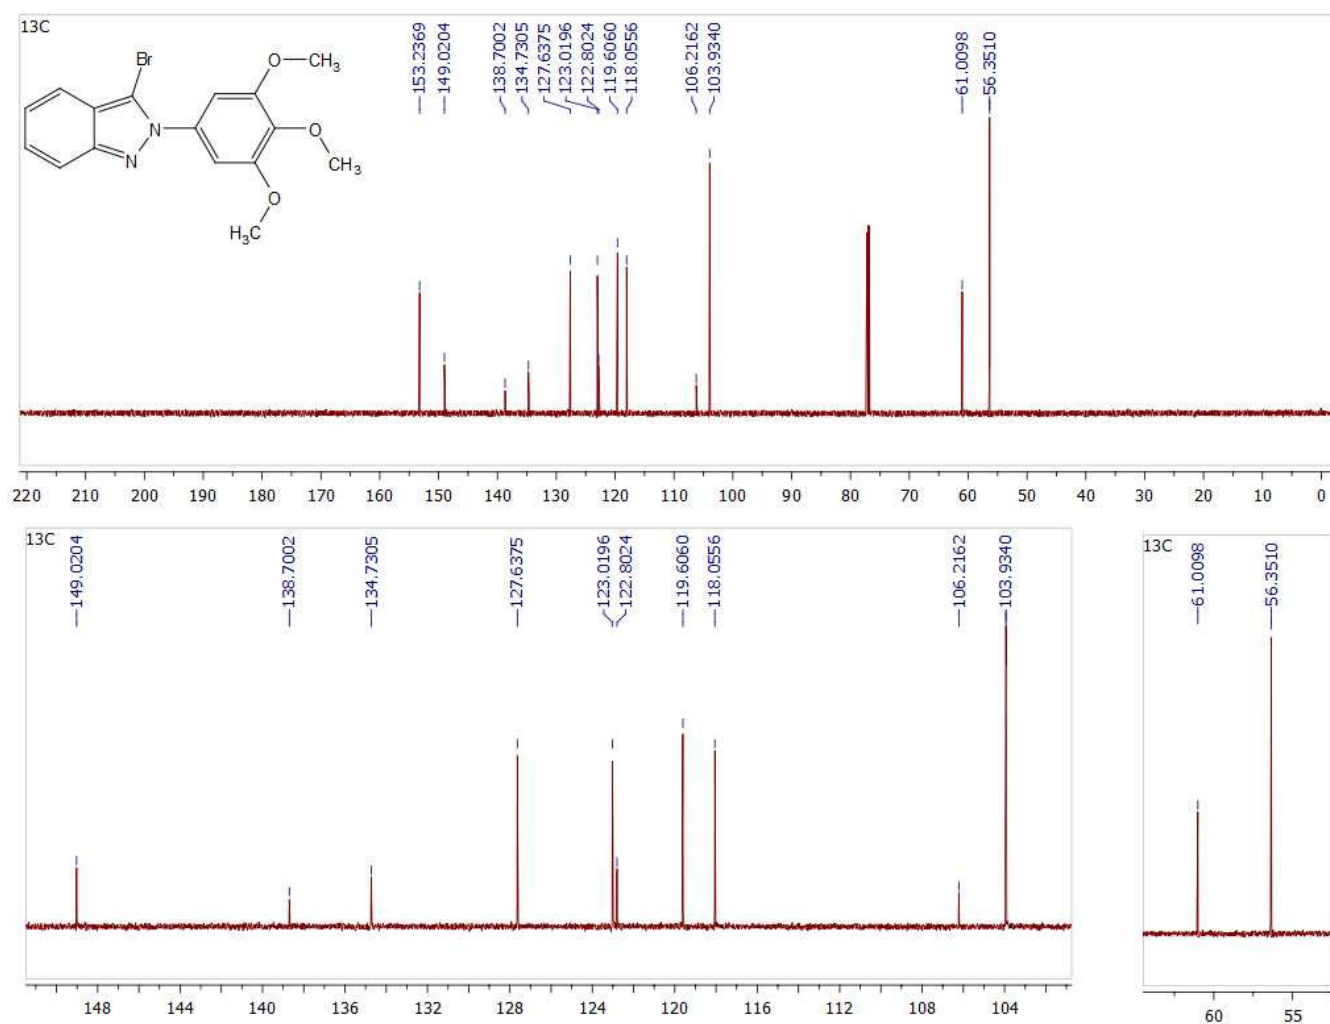

**Figure S11.**  $^{13}\text{C}$  NMR (151 MHz,  $\text{CDCl}_3$ ) for 3-bromo-2-(3,4,5-trimethoxyphenyl)-2H-indazole (**2b**).

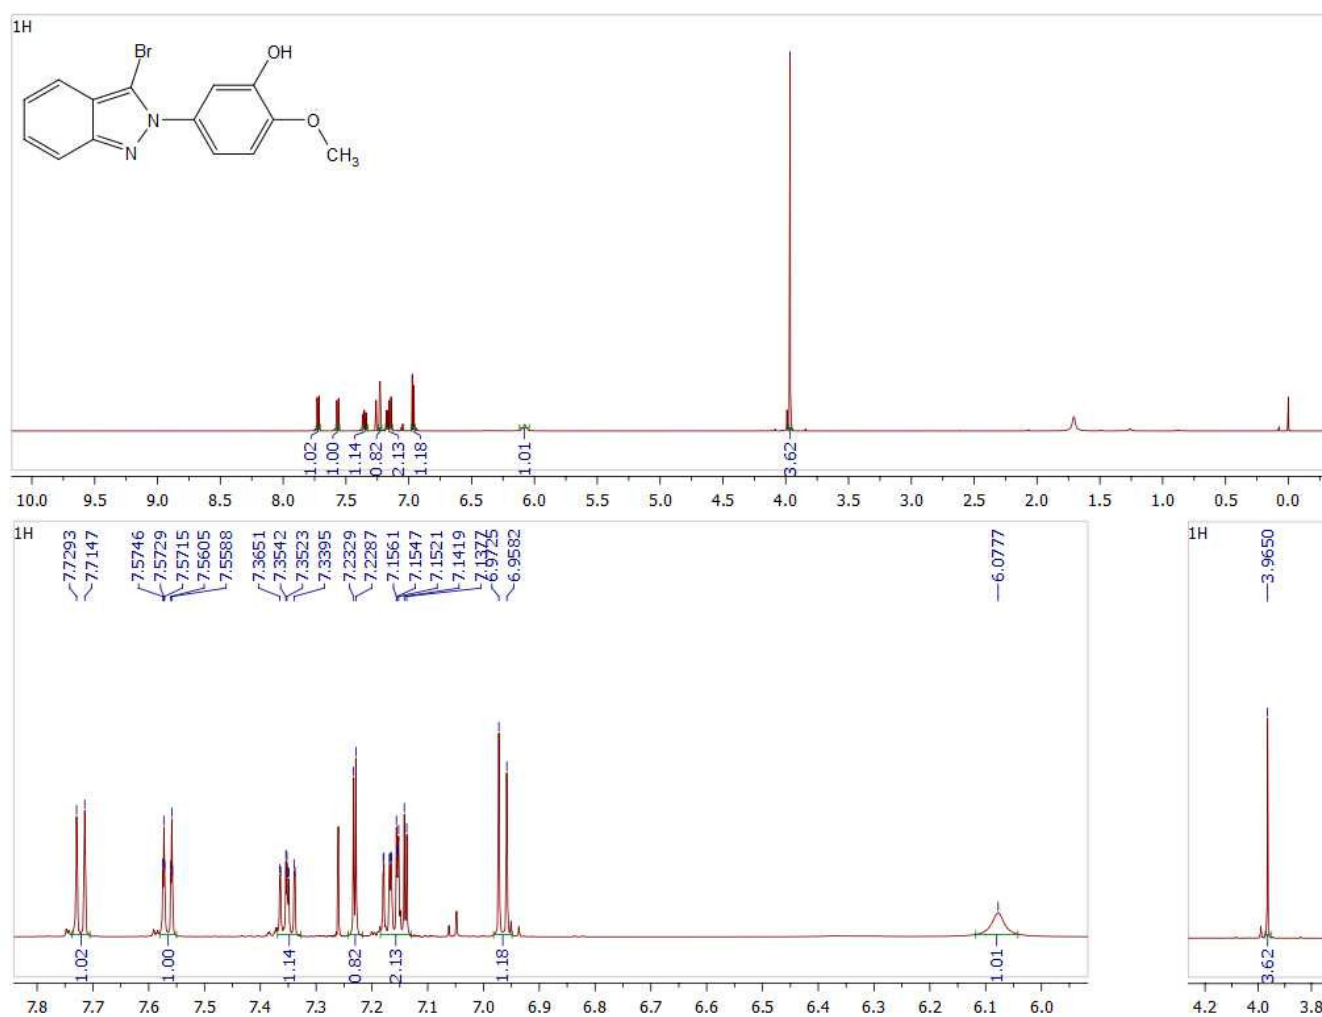

Figure S12.  $^1\text{H}$  NMR (600 MHz,  $\text{CDCl}_3$ ) for 5-(3-bromo-2H-indazol-2-yl)-2-methoxyphenol (**3b**).

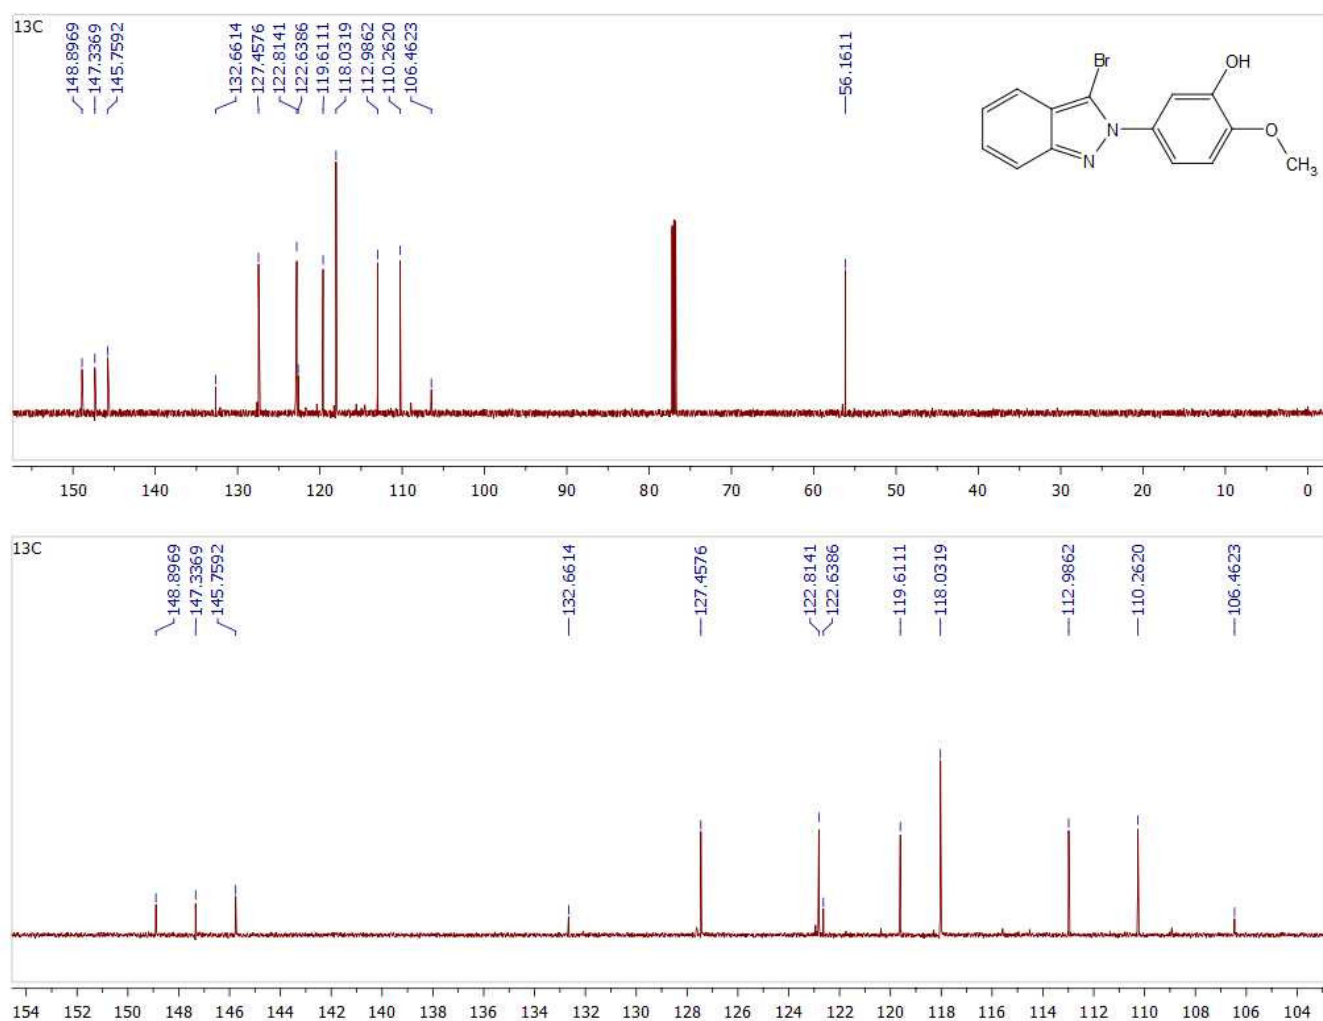

Figure S13.  $^{13}\text{C}$  NMR (151 MHz,  $\text{CDCl}_3$ ) for 5-(3-bromo-2H-indazol-2-yl)-2-methoxyphenol (**3b**).

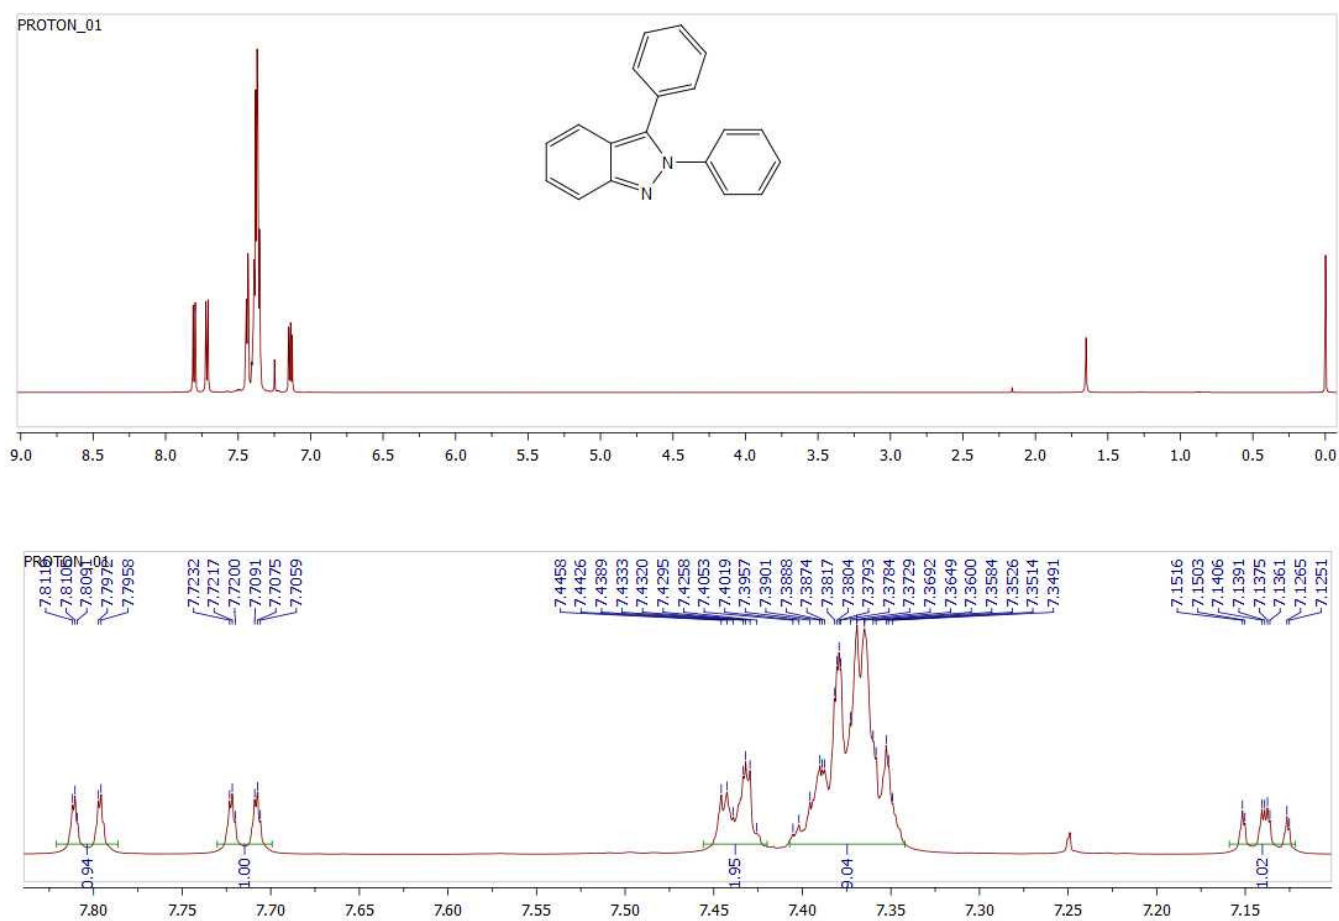

**Figure S14.** <sup>1</sup>H NMR (600 MHz, CDCl<sub>3</sub>) for 2,3-diphenyl-2H-indazole (4).

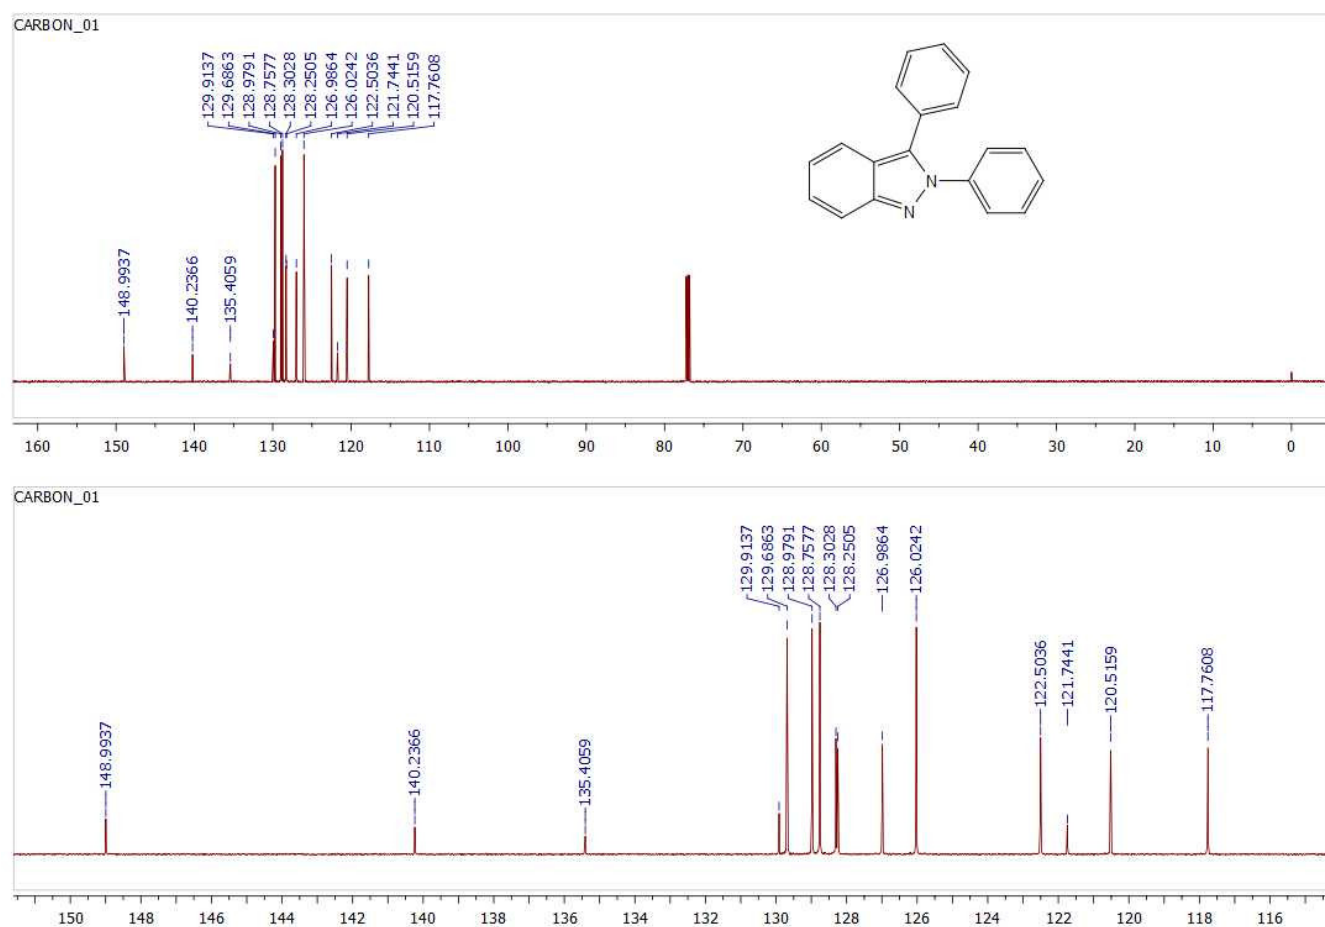

Figure S15.  $^{13}\text{C}$  NMR (151 MHz,  $\text{CDCl}_3$ ) for 2,3-diphenyl-2H-indazole (4).

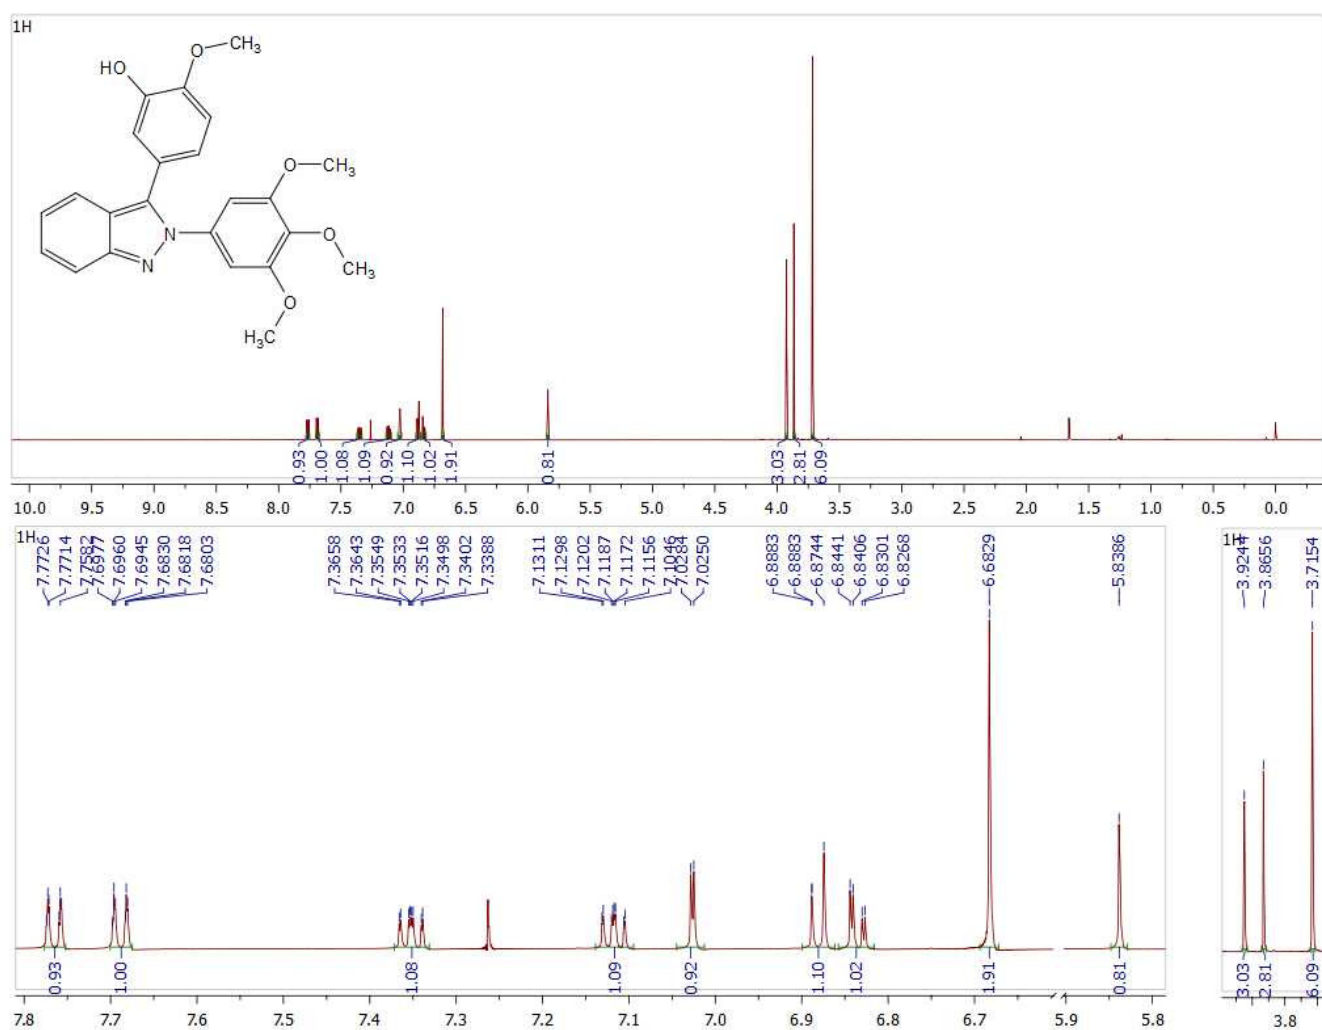

**Figure S16.**  $^1\text{H}$  NMR (600 MHz,  $\text{CDCl}_3$ ) for 2-methoxy-5-(2-(3,4,5-trimethoxyphenyl)-2H-indazol-3-yl)phenol (5).

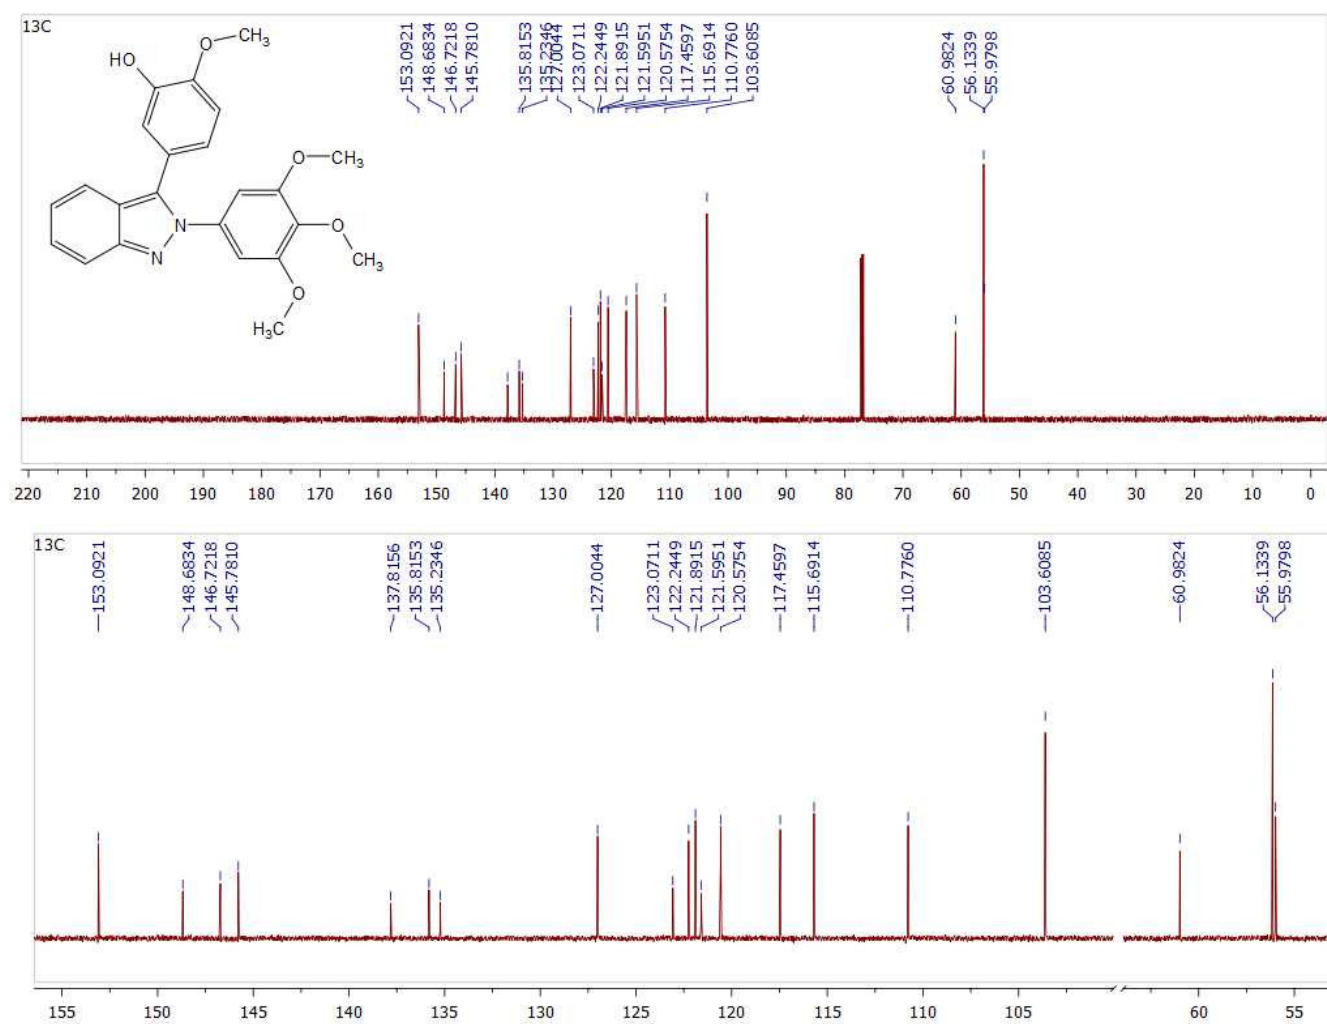

**Figure S17.**  $^{13}\text{C}$  NMR (151 MHz,  $\text{CDCl}_3$ ) for 2-methoxy-5-(2-(3,4,5-trimethoxyphenyl)-2H-indazol-3-yl)phenol (5).



**Acquisition Parameter**

|             |          |                      |          |                  |            |
|-------------|----------|----------------------|----------|------------------|------------|
| Source Type | ESI      | Ion Polarity         | Positive | Set Nebulizer    | 3.0 Bar    |
| Focus       | Active   | Set Capillary        | 4500 V   | Set Dry Heater   | 210 °C     |
| Scan Begin  | 50 m/z   | Set End Plate Offset | -500 V   | Set Dry Gas      | 10.0 l/min |
| Scan End    | 1000 m/z | Set Charging Voltage | 0 V      | Set Divert Valve | Source     |
|             |          | Set Corona           | 0 nA     | Set APCI Heater  | 0 °C       |

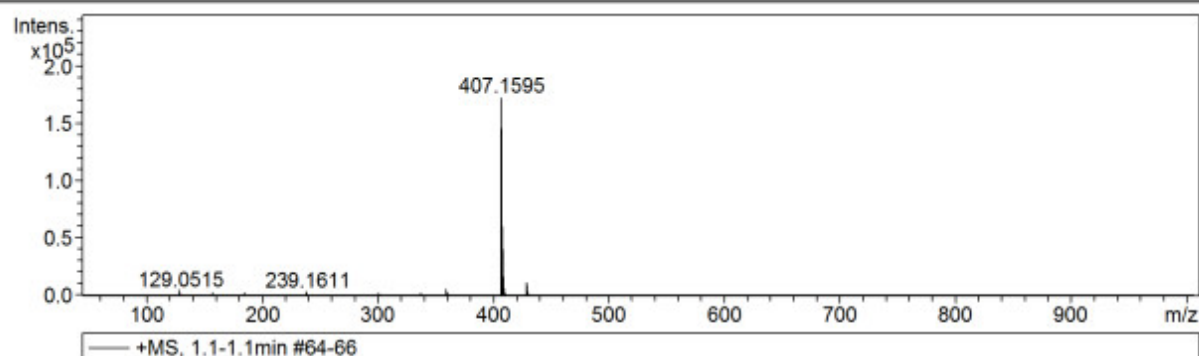

| #  | m/z      | Res. | S/N    | I      | I %   | FWHM   |
|----|----------|------|--------|--------|-------|--------|
| 1  | 129.0515 | 5073 | 129.4  | 3099   | 1.8   | 0.0254 |
| 2  | 155.0532 | 4673 | 13.3   | 331    | 0.2   | 0.0332 |
| 3  | 157.0659 | 5359 | 113.6  | 2828   | 1.6   | 0.0293 |
| 4  | 185.1139 | 4823 | 102.9  | 2651   | 1.5   | 0.0384 |
| 5  | 213.1454 | 5863 | 25.1   | 671    | 0.4   | 0.0364 |
| 6  | 227.1257 | 4830 | 12.0   | 327    | 0.2   | 0.0470 |
| 7  | 239.1611 | 5785 | 95.7   | 2667   | 1.6   | 0.0413 |
| 8  | 250.1787 | 5570 | 16.8   | 476    | 0.3   | 0.0449 |
| 9  | 301.1428 | 5275 | 54.8   | 1704   | 1.0   | 0.0571 |
| 10 | 302.1458 | 9757 | 10.9   | 339    | 0.2   | 0.0310 |
| 11 | 338.3436 | 6810 | 25.5   | 846    | 0.5   | 0.0497 |
| 12 | 360.3249 | 5786 | 120.2  | 4039   | 2.4   | 0.0623 |
| 13 | 361.3269 | 5182 | 30.4   | 1021   | 0.6   | 0.0697 |
| 14 | 405.0017 | 4781 | 10.2   | 356    | 0.2   | 0.0847 |
| 15 | 405.1376 | 3192 | 9.3    | 323    | 0.2   | 0.1269 |
| 16 | 407.1595 | 6079 | 4937.0 | 171637 | 100.0 | 0.0670 |
| 17 | 407.6048 | 3202 | 25.3   | 880    | 0.5   | 0.1273 |
| 18 | 407.7180 | 3558 | 27.2   | 945    | 0.6   | 0.1146 |
| 19 | 407.8351 | 3716 | 28.7   | 999    | 0.6   | 0.1098 |
| 20 | 408.1630 | 5621 | 1353.9 | 47119  | 27.5  | 0.0726 |
| 21 | 408.7816 | 4406 | 11.8   | 410    | 0.2   | 0.0928 |
| 22 | 409.1664 | 5799 | 242.7  | 8451   | 4.9   | 0.0706 |
| 23 | 410.1670 | 5297 | 26.3   | 917    | 0.5   | 0.0774 |
| 24 | 429.1413 | 5326 | 327.5  | 11406  | 6.6   | 0.0806 |
| 25 | 430.1448 | 5353 | 81.8   | 2849   | 1.7   | 0.0804 |
| 26 | 431.1475 | 5984 | 15.9   | 554    | 0.3   | 0.0720 |
| 27 | 449.1973 | 6927 | 14.7   | 506    | 0.3   | 0.0649 |
| 28 | 453.7874 | 4980 | 9.1    | 310    | 0.2   | 0.0911 |
| 29 | 563.2341 | 6368 | 13.1   | 401    | 0.2   | 0.0884 |
| 30 | 645.3045 | 6808 | 12.2   | 330    | 0.2   | 0.0948 |

Figure S18. MS (HR-ESI) for 2-methoxy-5-(2-(3,4,5-trimethoxyphenyl)-2H-indazol-3-yl)phenol (5).

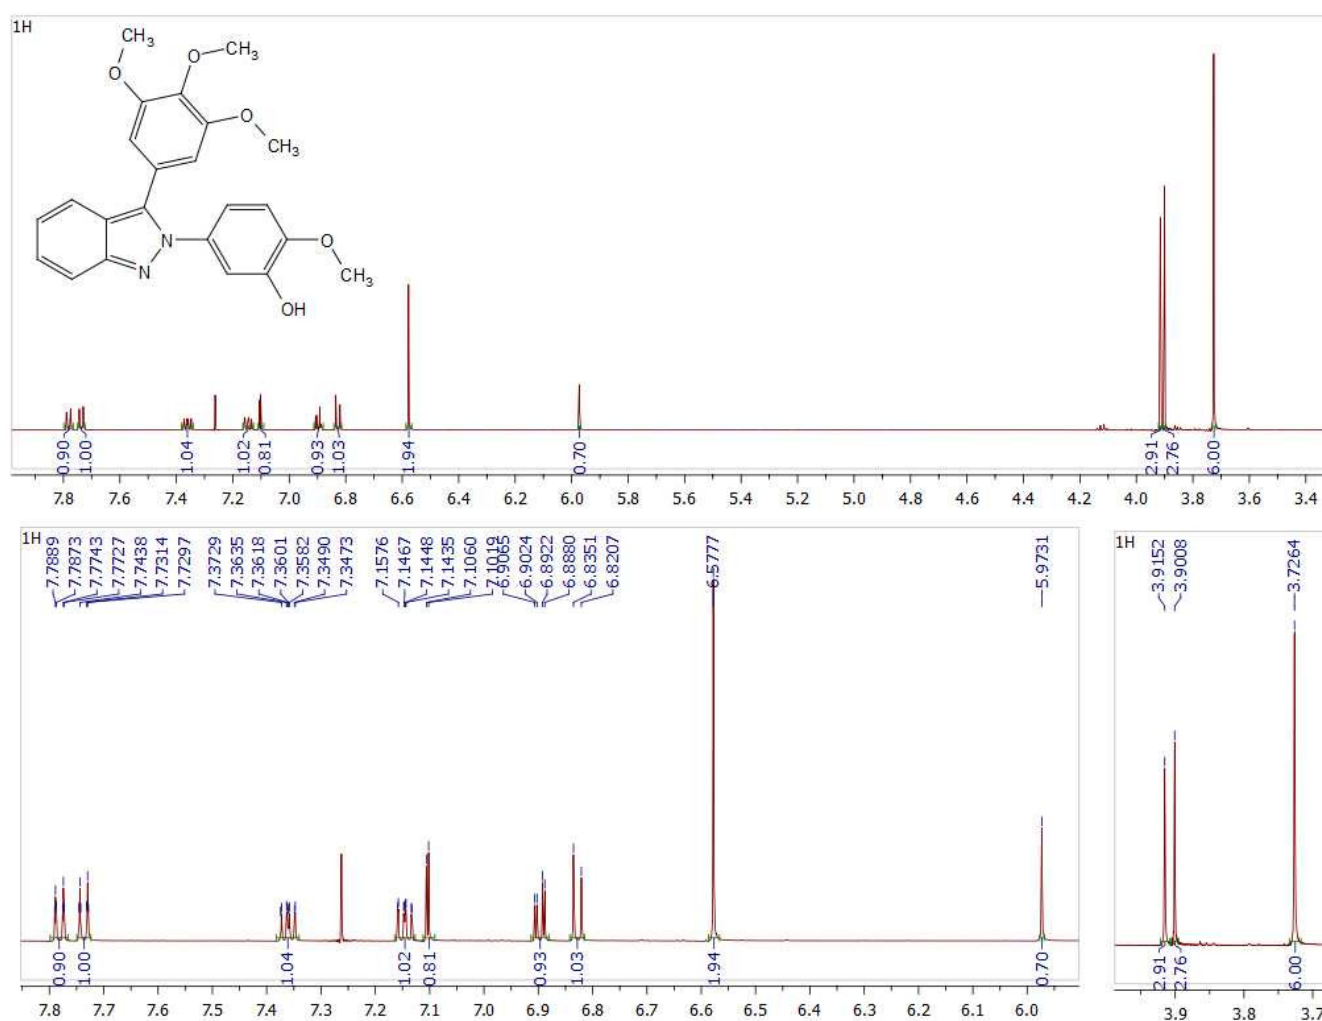

**Figure S19.**  $^1\text{H}$  NMR (600 MHz,  $\text{CDCl}_3$ ) for 2-methoxy-5-(3-(3,4,5-trimethoxyphenyl)-2H-indazol-2-yl)phenol (6).

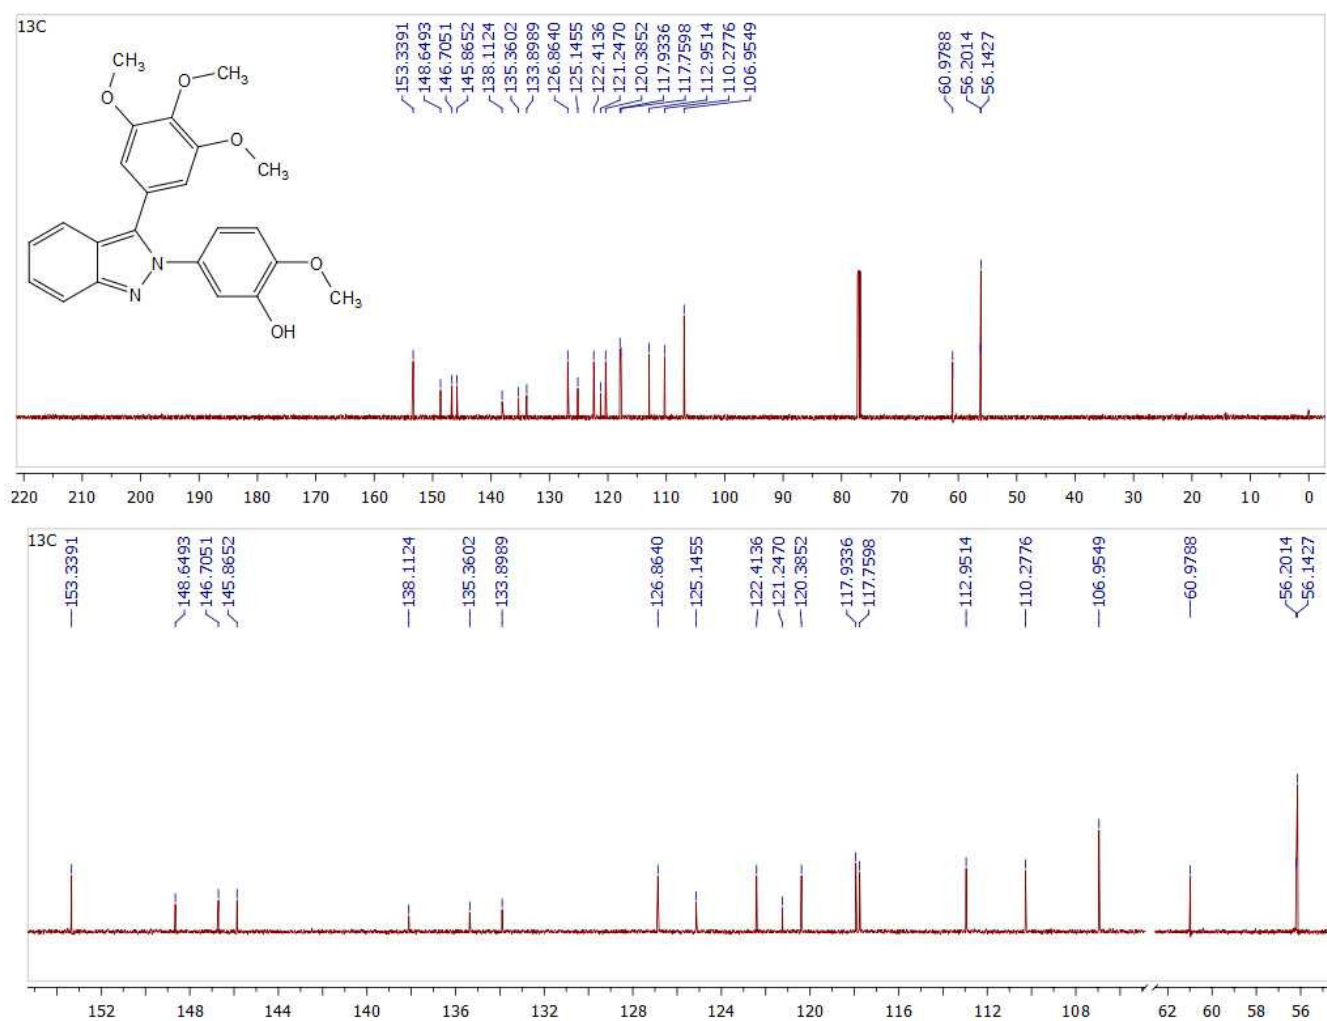

**Figure S20.**  $^{13}\text{C}$  NMR (151 MHz,  $\text{CDCl}_3$ ) for 2-methoxy-5-(3-(3,4,5-trimethoxyphenyl)-2H-indazol-2-yl)phenol (6).

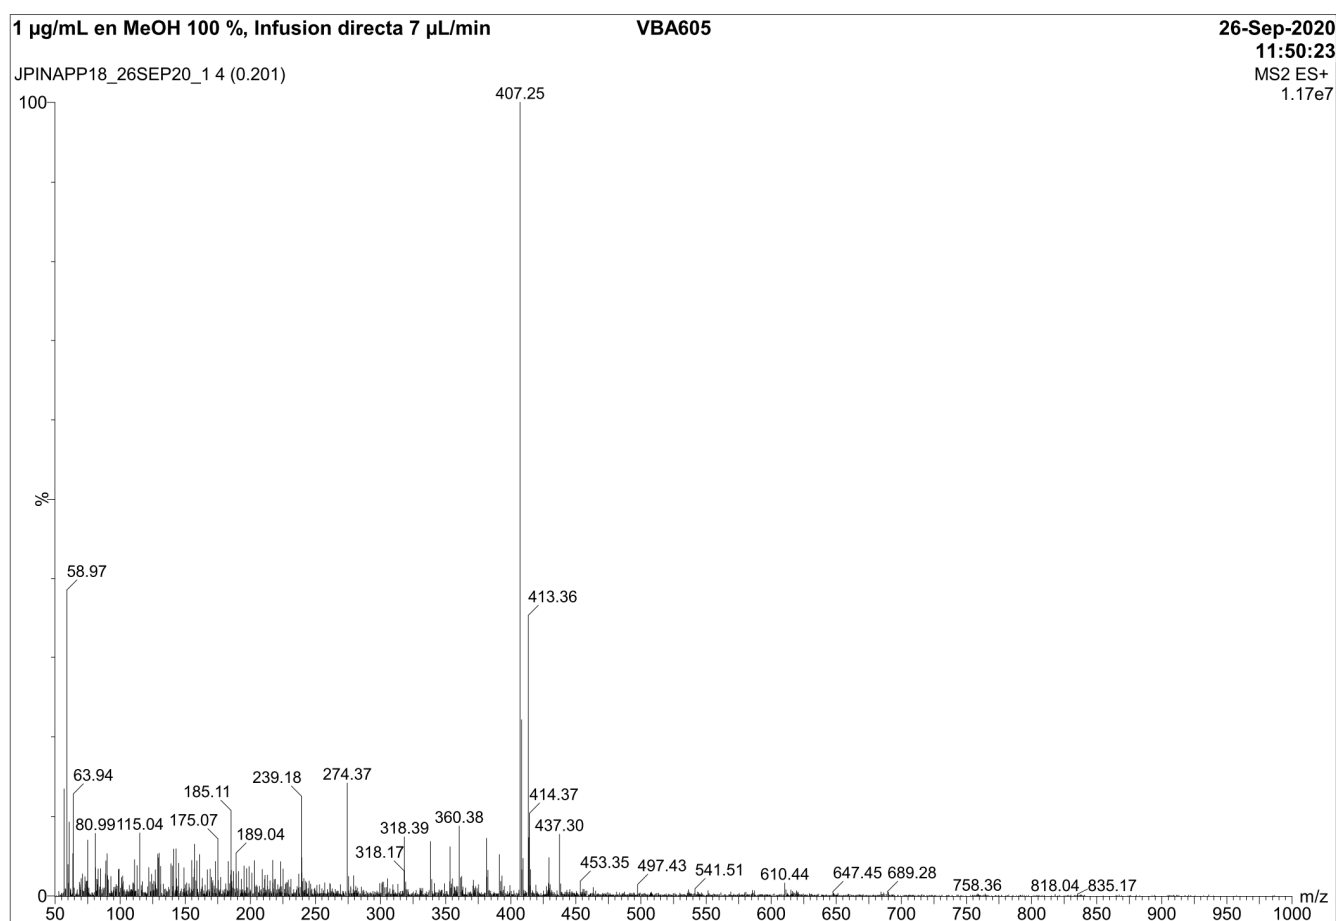

Figure S21. MS (EI) for 2-methoxy-5-(3-(3,4,5-trimethoxyphenyl)-2H-indazol-2-yl)phenol (6).

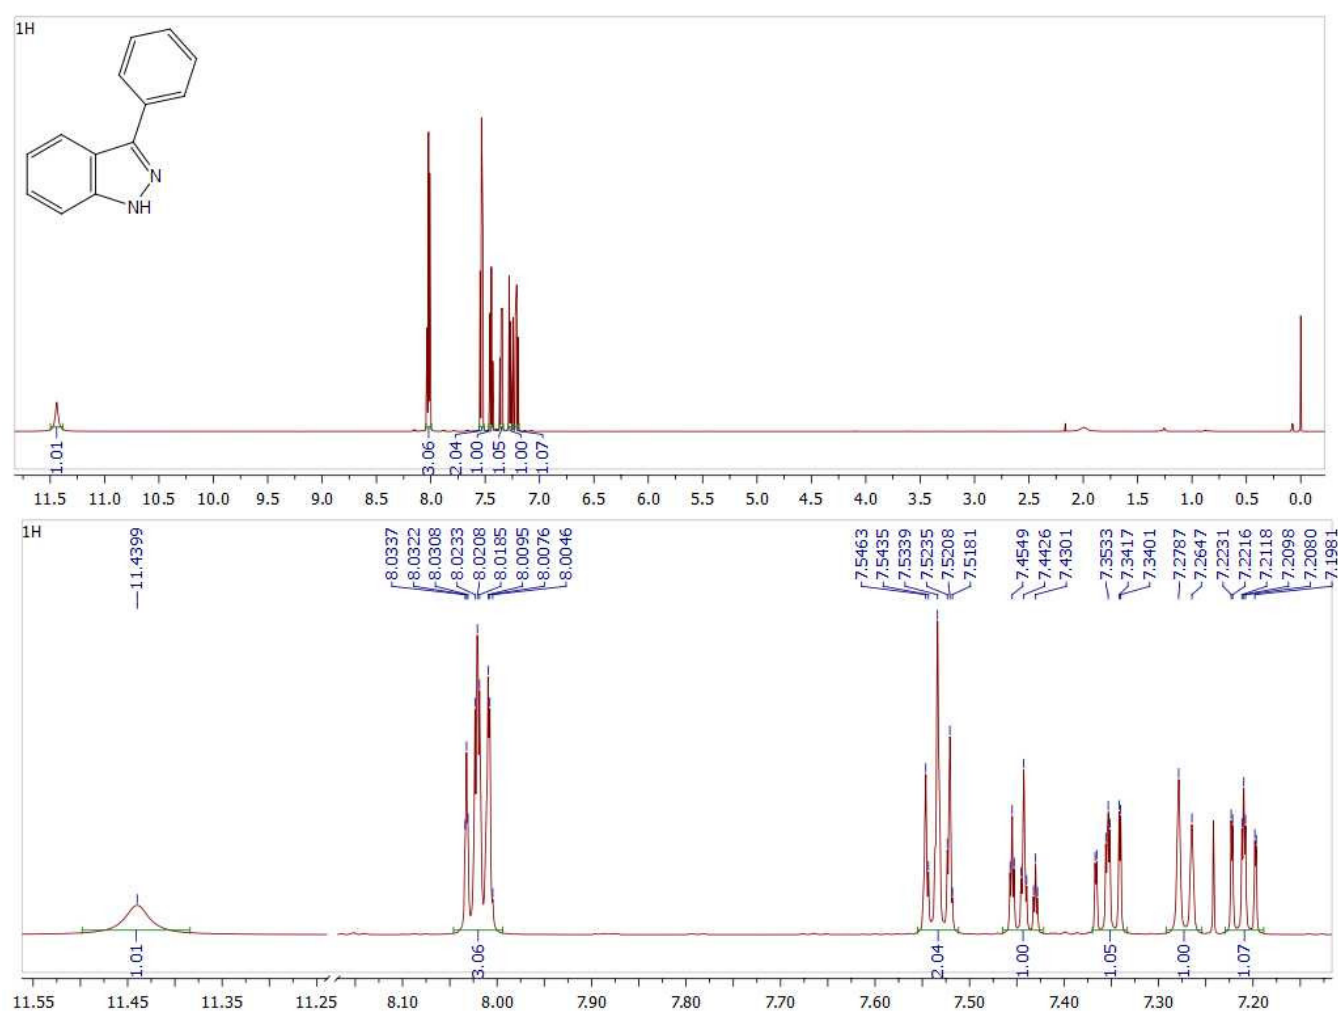

Figure S22.  $^1\text{H}$  NMR (600 MHz,  $\text{CDCl}_3$ ) for 3-phenyl-1H-indazole (7).

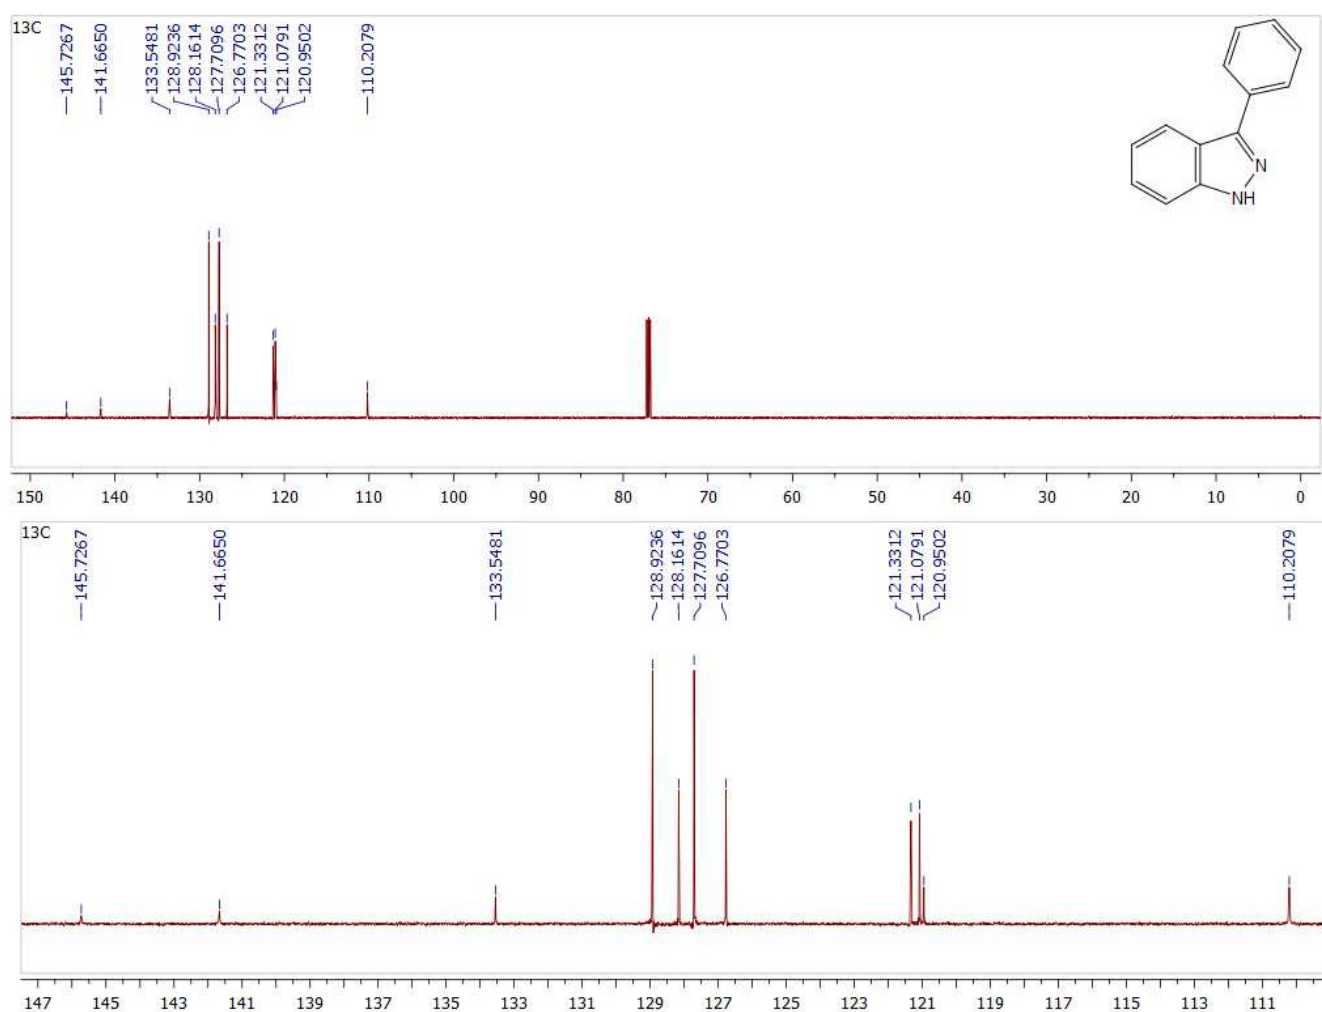

**Figure S23.**  $^{13}\text{C}$  NMR (151 MHz,  $\text{CDCl}_3$ ) for 3-phenyl-1H-indazole (7).

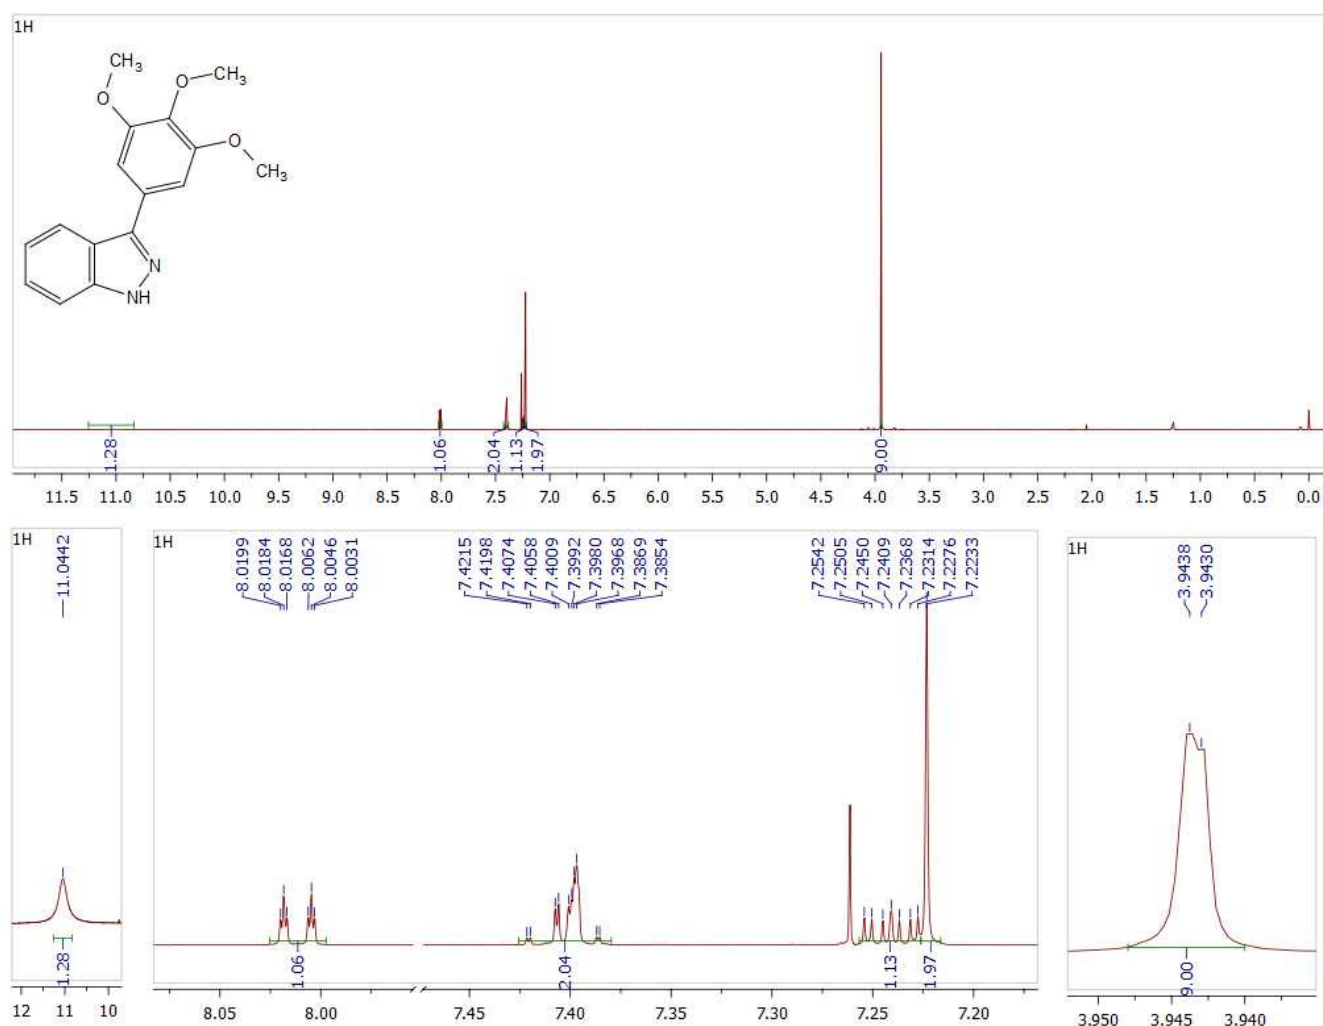

**Figure S24.** <sup>1</sup>H NMR (600 MHz, CDCl<sub>3</sub>) for 3-(3,4,5-trimethoxyphenyl)-1H-indazole (8).

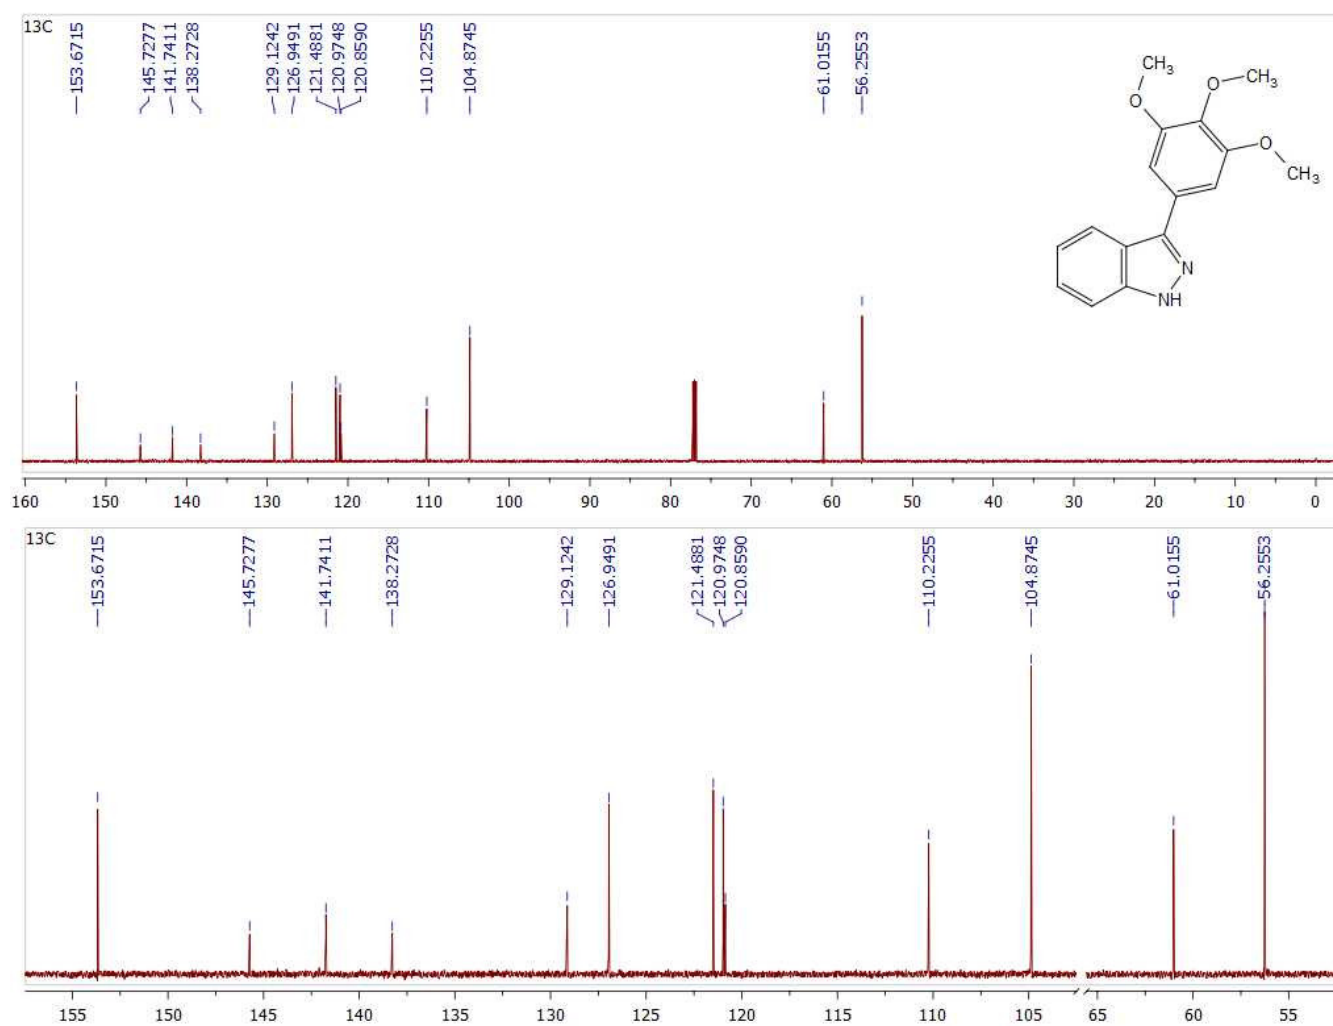

Figure S25.  $^{13}\text{C}$  NMR (151 MHz,  $\text{CDCl}_3$ ) for 3-(3,4,5-trimethoxyphenyl)-1H-indazole (8).



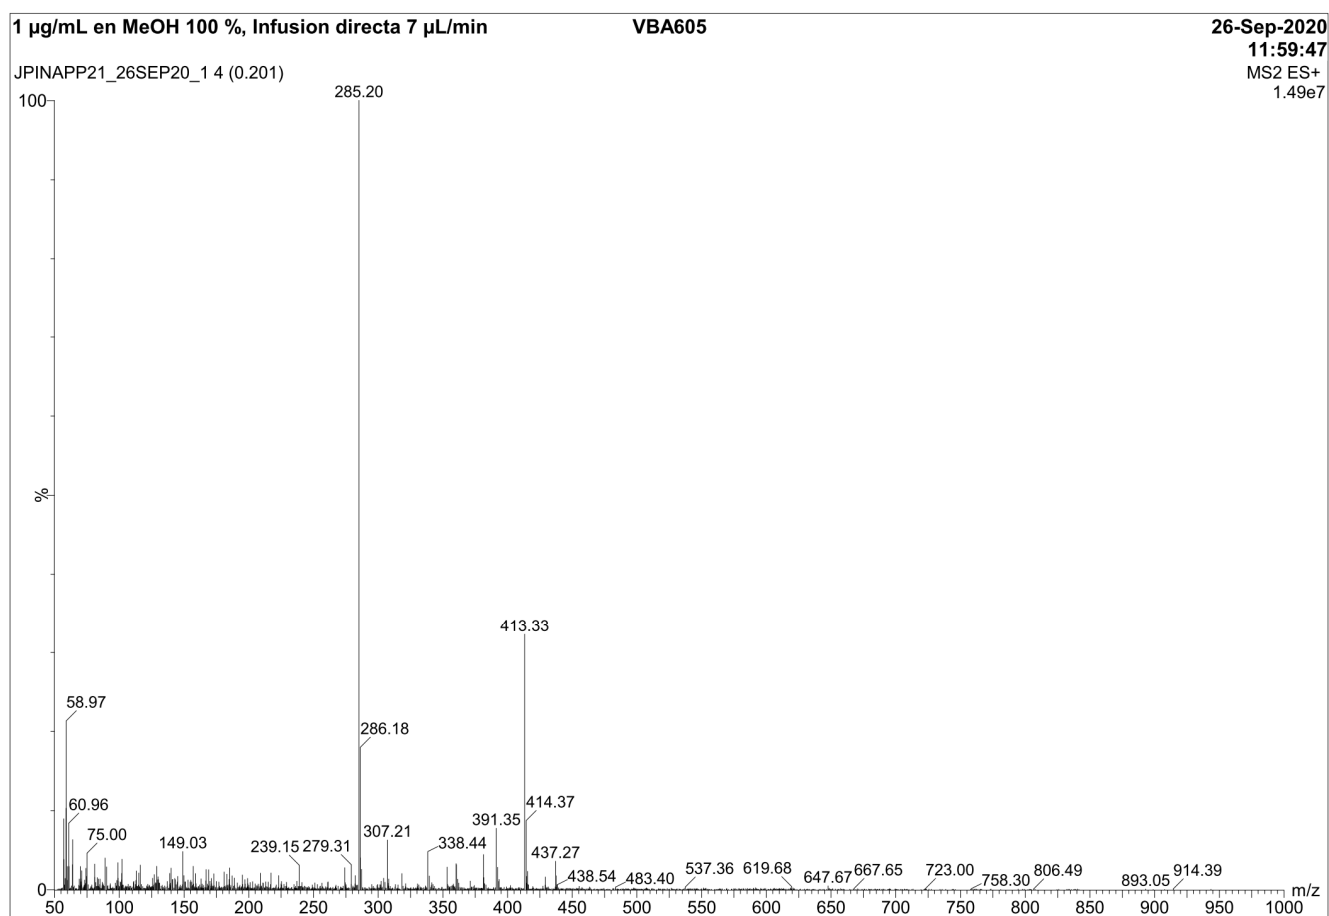

Figure S26. MS (EI) for 3-(3,4,5-trimethoxyphenyl)-1H-indazole (8).

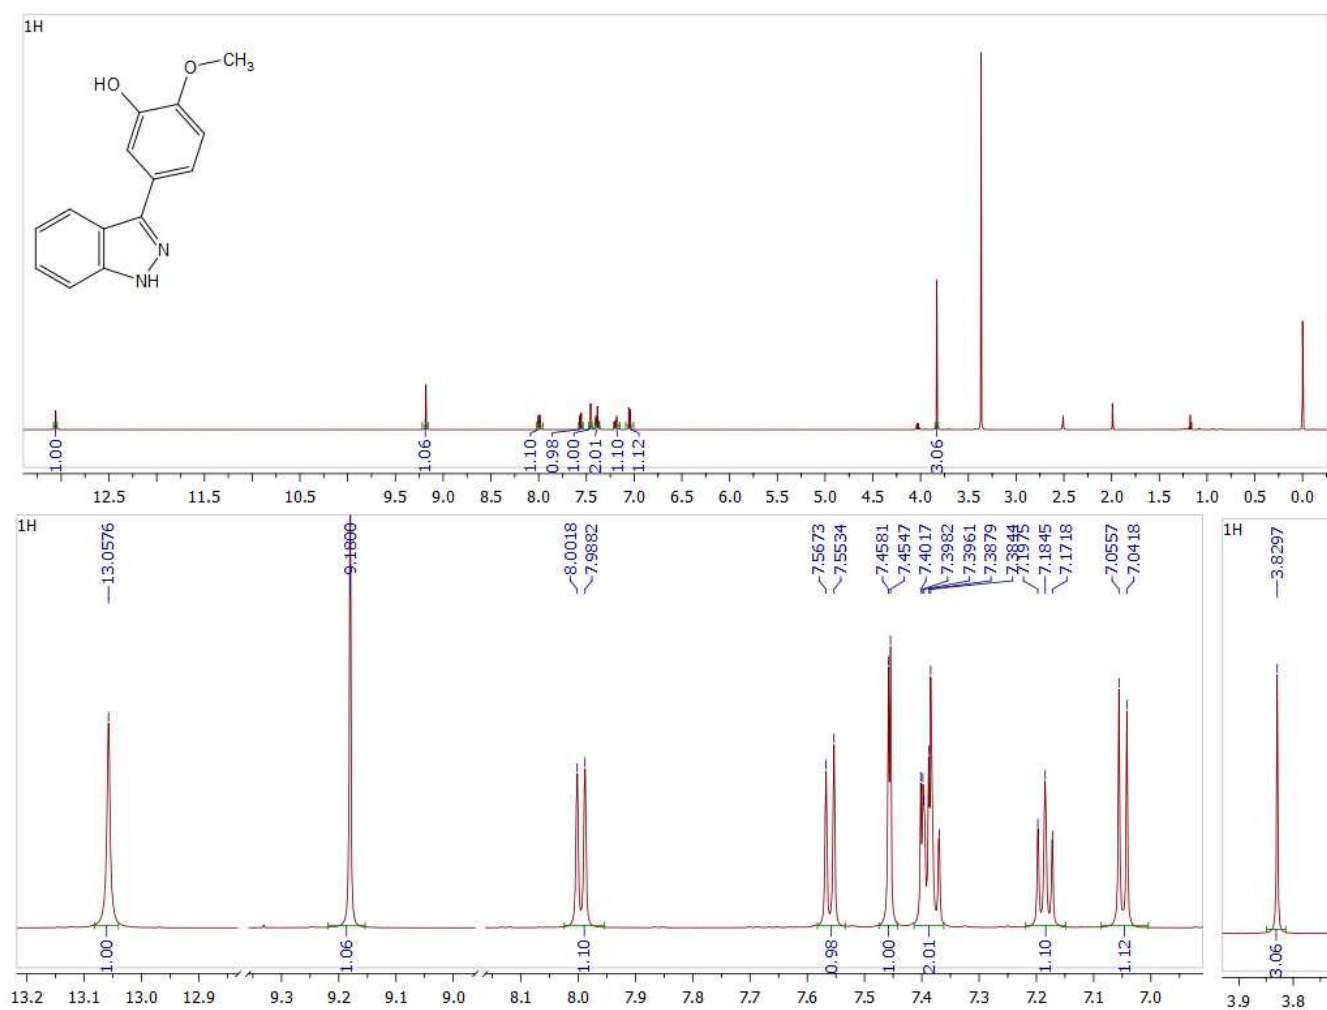

Figure S27.  $^1\text{H}$  NMR (600 MHz,  $\text{DMSO}-d_6$ ) for 5-(1H-indazol-3-yl)-2-methoxyphenol (9).

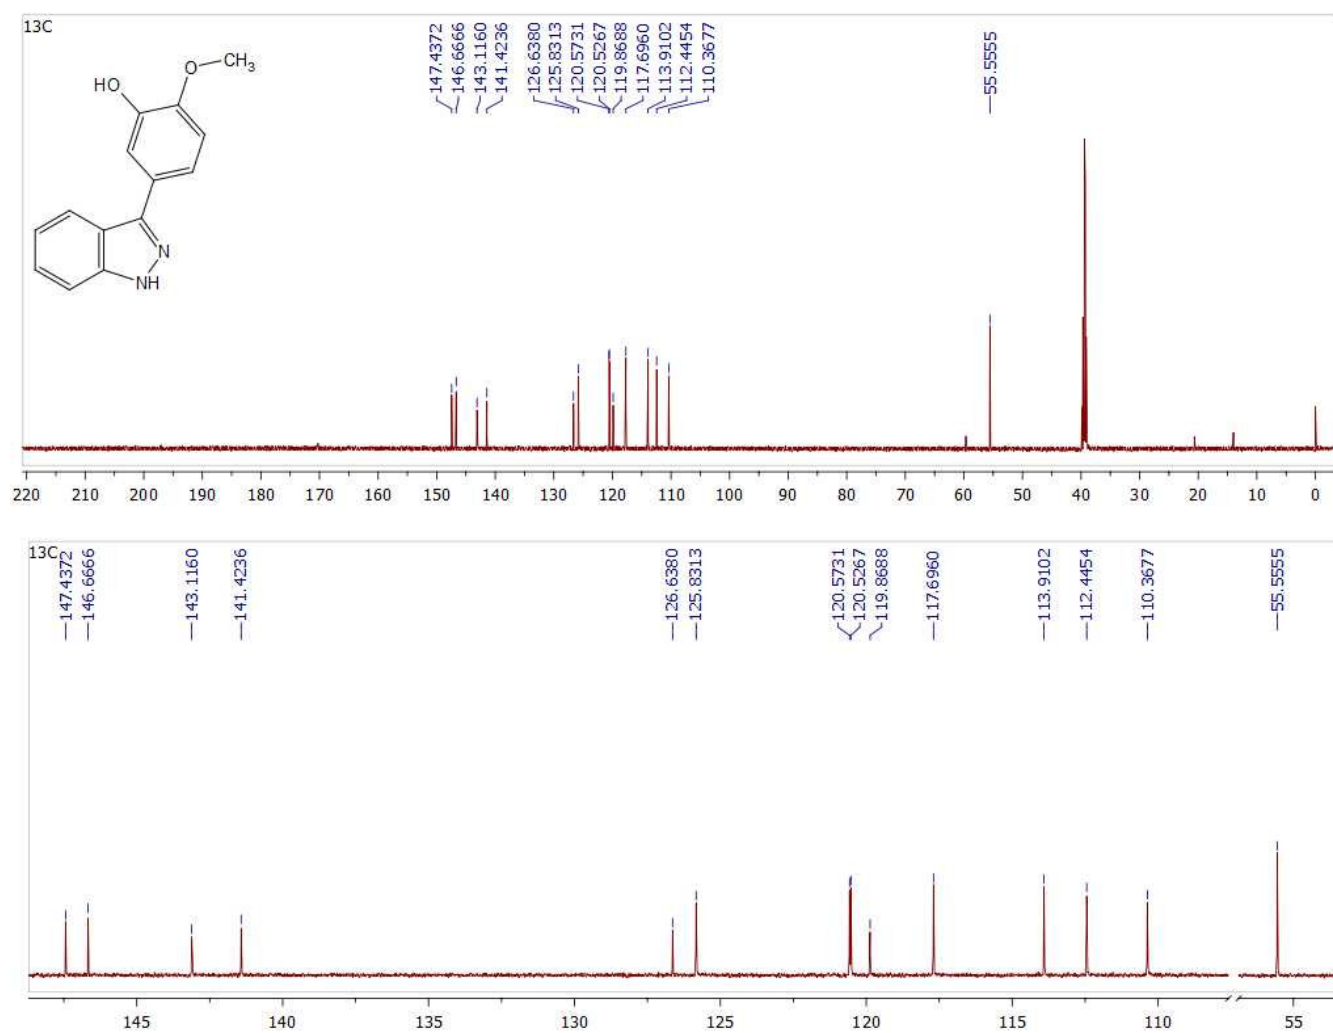

Figure S28.  $^{13}\text{C}$  NMR (151 MHz,  $\text{DMSO}-d_6$ ) for 5-(1H-indazol-3-yl)-2-methoxyphenol (9).

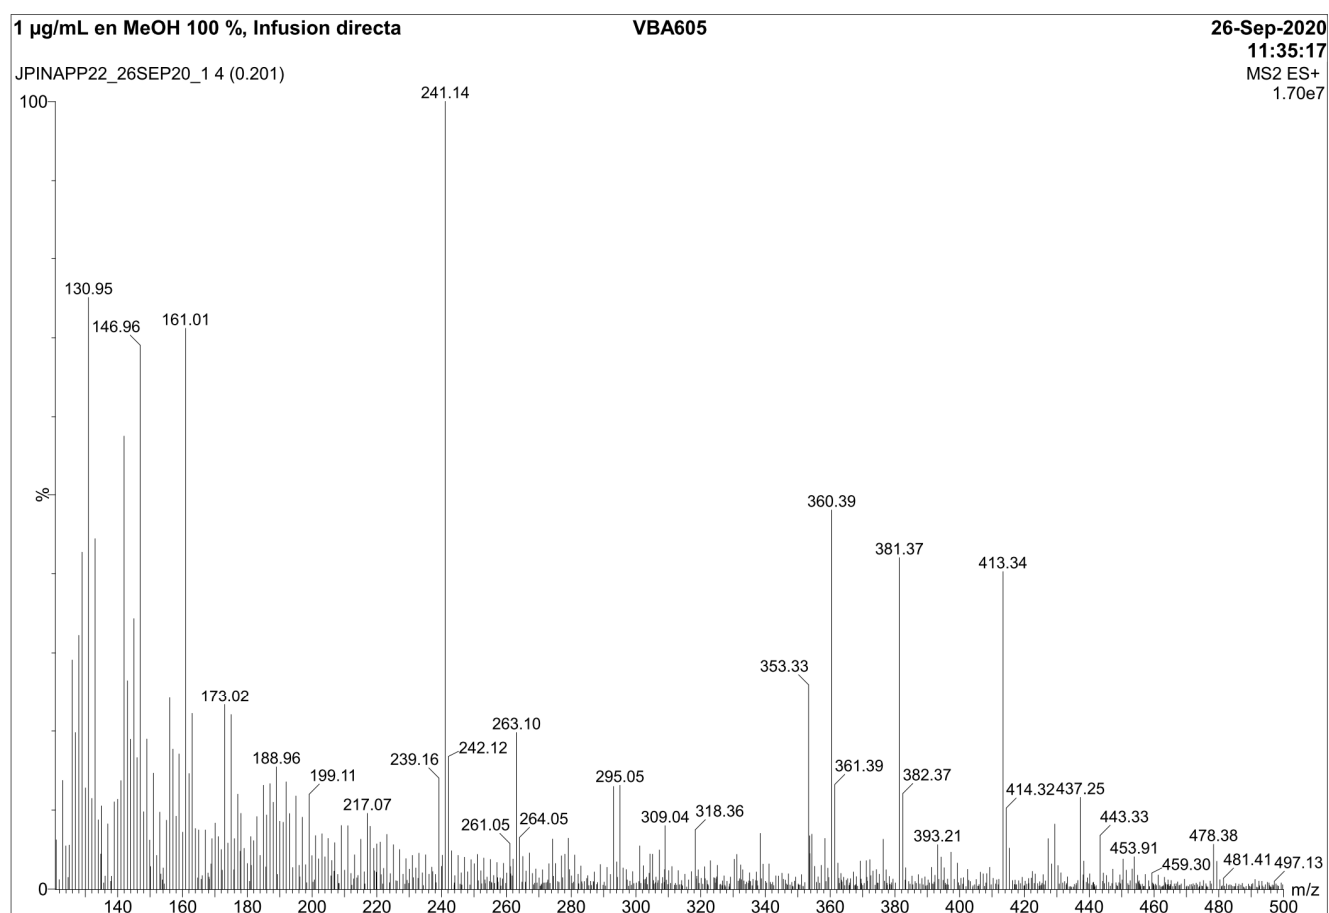

Figure S29. MS (EI) for 5-(1H-indazol-3-yl)-2-methoxyphenol (9).

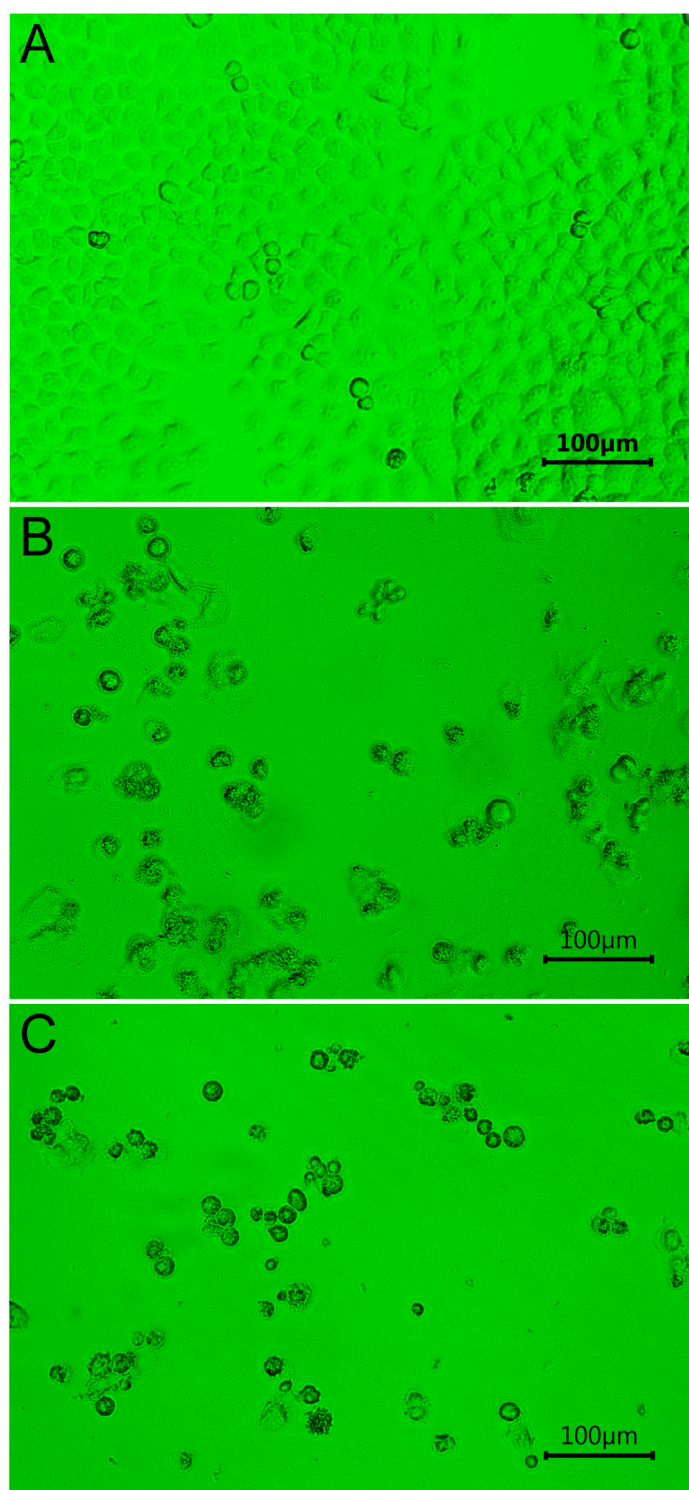

**Figure S30.** Morphological changes of HeLa cells after 48 h of treatment. **A)** vehicle (DMSO); **B)** Compound 5 (10  $\mu$ M); **C)** Compound 6 (10  $\mu$ M).

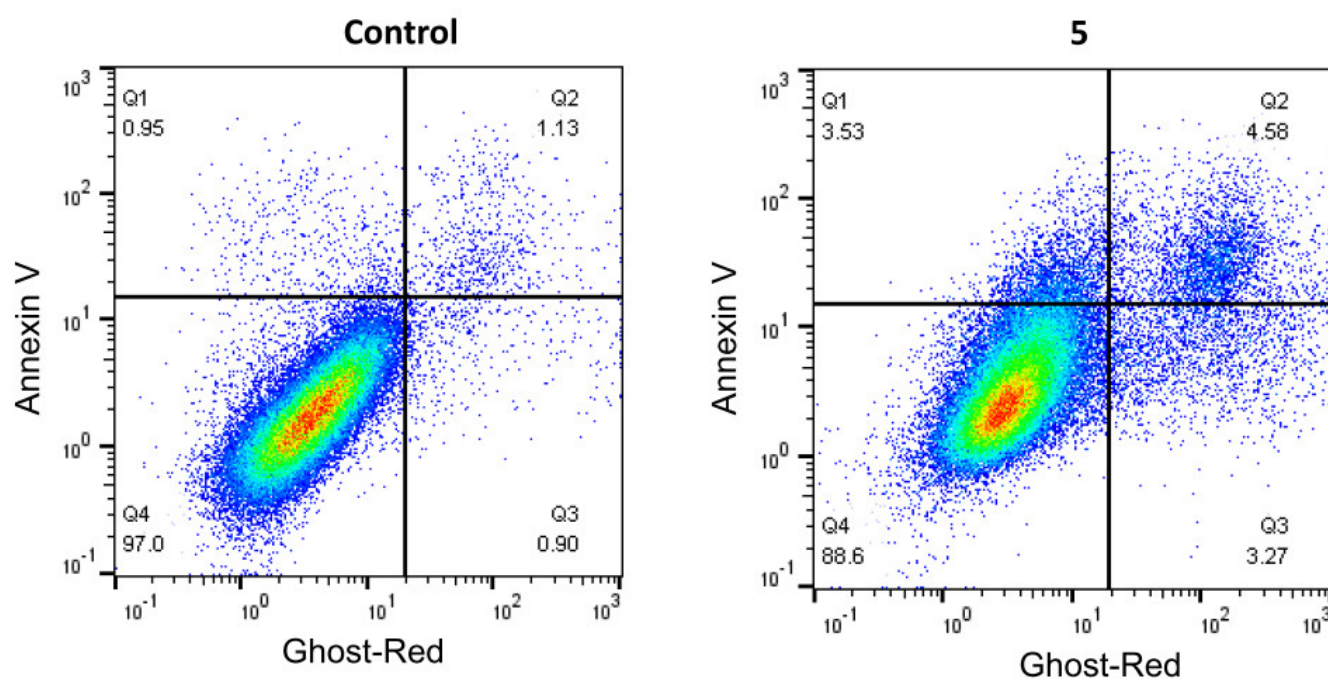

**Figure S31.** Quantitative apoptosis assay of HeLa using Annexin V-FITC/Ghost-Red. Biparametric representation obtained from the flow cytometry assay of control HeLa cells (Control) or treated with compound 5 (0.16  $\mu$ M) at 48 h. Q4 (viable cells), the apoptosis ratios (early plus late apoptotic cells, Q3 + Q2 quadrants) and Q1 (necrotic cells).
